# Supplementary material for: Pseudogene AK4P1 promotes pancreatic ductal adenocarcinoma progression through relieving miR-375-mediated YAP1 degradation
Source: publisher site journal article supplement (doi:10.18632/aging.203921), 2022-02-27
Supplement: Supplementary file [file aging-v14i4-203921-supplementary-material-SD1.pdf]

## SUPPLEMENTARY FIGURES

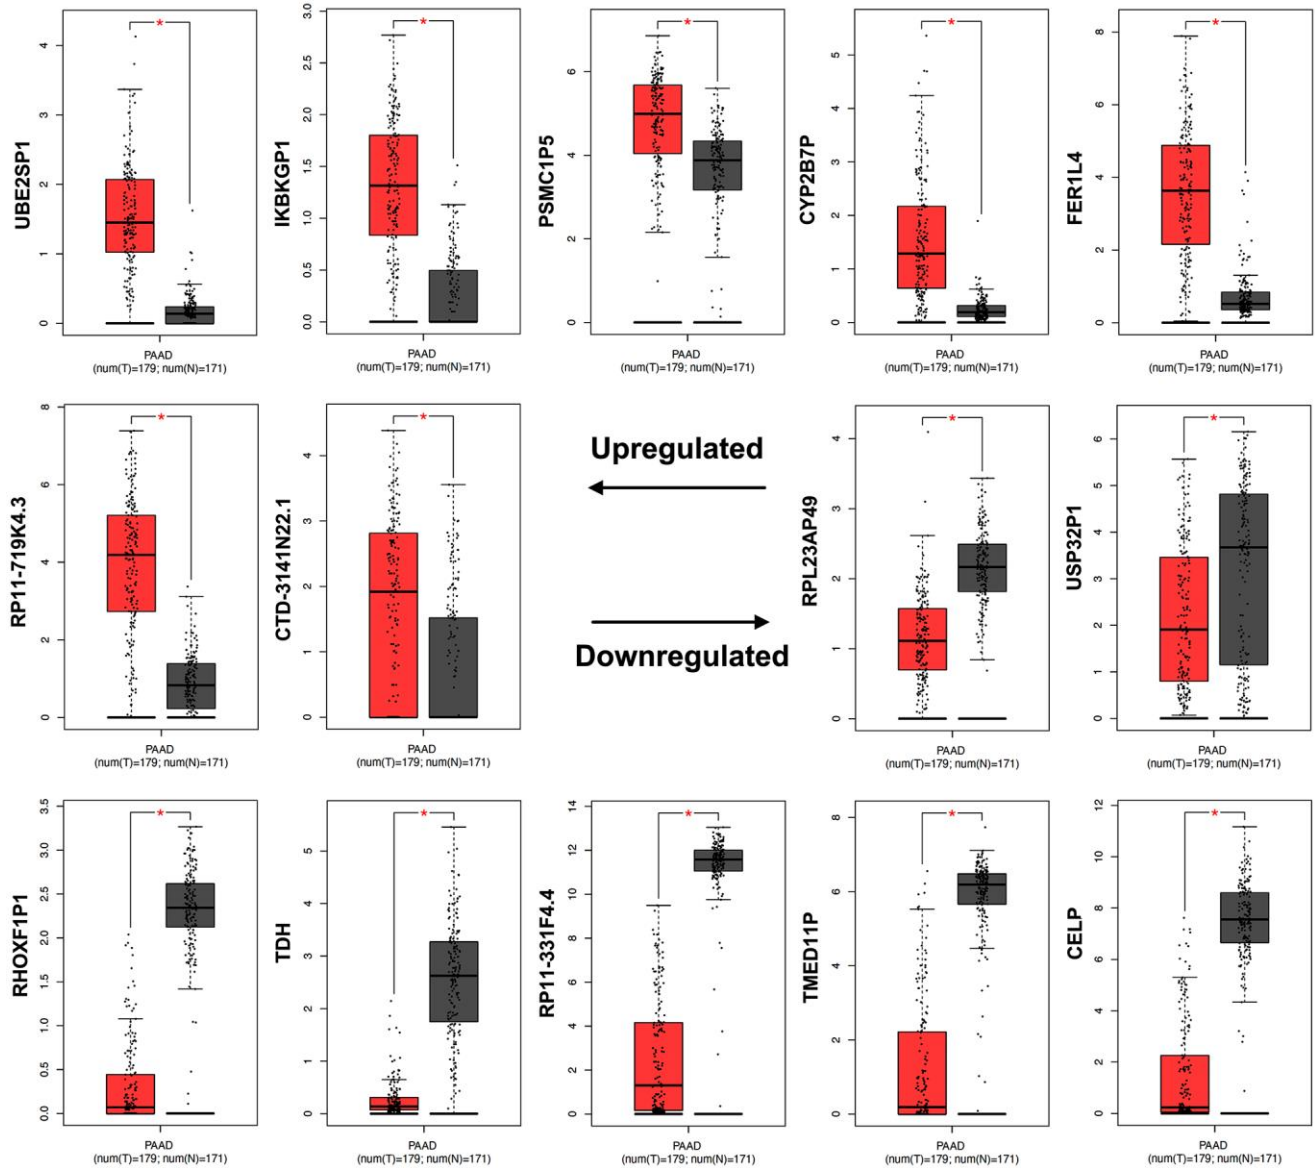

**Supplementary Figure 1. Expression of 14 potential DEPs in PDAC.** Expression of 14 potential DEPs in PDAC and normal pancreas tissues from TCGA and GTEx data. Three horizontal lines in the box plot represent minimum, median and maximum, respectively; \* $P < 0.05$ .

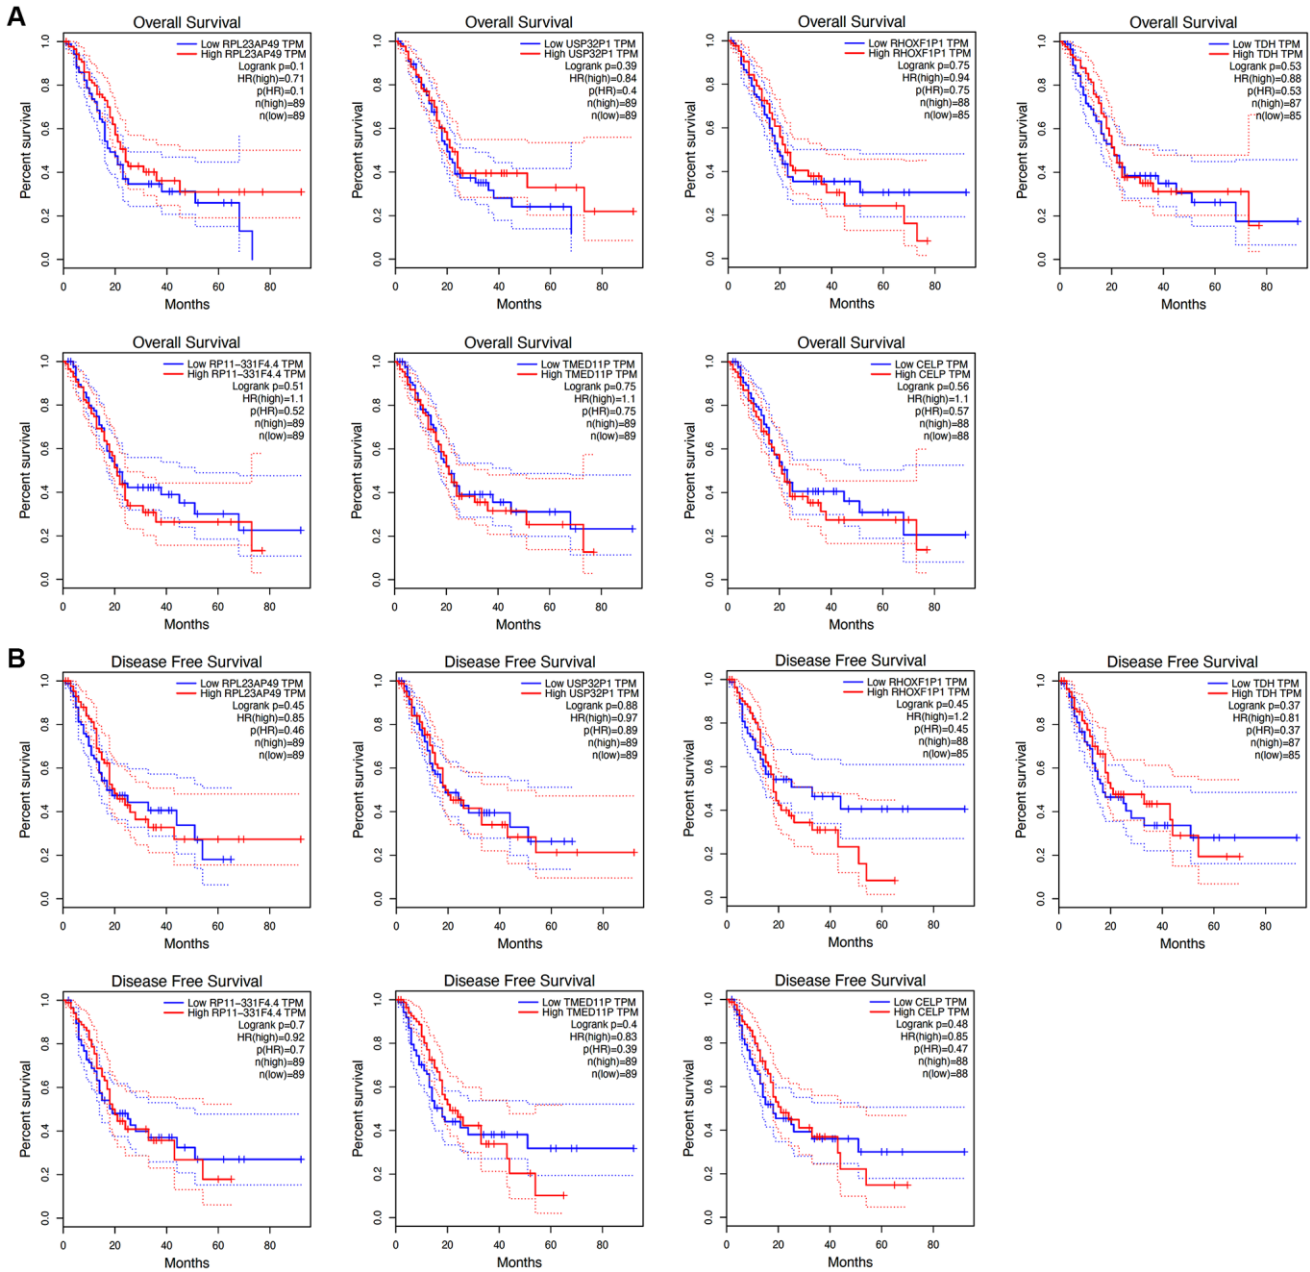

**Supplementary Figure 2. Prognostic role of 7 potential upregulated DEPs in PDAC. (A)** Prognostic role (OS) of 7 potential upregulated DEPs in PDAC. **(B)** Prognostic role (DFS) of 7 potential upregulated DEPs in PDAC.
