# Supplementary material for: Pseudogene AK4P1 promotes pancreatic ductal adenocarcinoma progression through relieving miR-375-mediated YAP1 degradation
Source: Aging (Albany NY). 2022 Feb 27;14(4):1983–2003. doi: 10.18632/aging.203921 (PMC8908928; doi:10.18632/aging.203921)
Supplement: Supplementary Table 1 [file aging-14-203921-s002.xlsx]

## Sheet: Supplementary Table 1
Supplementary Table 1. Differentially expressed pseudogenes (DEPs) in PDAC from dreamBase database.
Downregulated Genes	log2FC	Upregulated Genes	log2FC	#FC=(Average Expression In Tumor Tissue)/(Average Expression In Normal Tissue)
RPL23AP21	-4.67	CTD-3141N22.1	7.73
RP11-562A8.1	-3.96	RP11-848P1.7	6.32
BTF3P10	-3.9	ZBTB45P1	6.23
CELP	-3.84	RP11-1223D19.2	5.86
CH17-260O16.1	-3.71	IGHV5-78	4.95
TMED11P	-3.55	RP11-402P6.13	4.95
RP11-241F15.1	-3.42	RP11-392E22.5	4.81
NT5CP1	-3.42	CYMP	4.81
FABP5P3	-3.12	OR7E91P	4.64
TOP3BP1	-2.89	RP11-309L24.6	4.54
RP11-348H3.2	-2.89	FAM27B	4.53
RP11-193F5.4	-2.86	AC002075.4	4.52
CTSLP1	-2.8	COX20P1	4.25
RP13-1039J1.2	-2.79	RPS26P47	4.17
TMED10P2	-2.78	RP11-64D22.5	4
IGKV2-29	-2.77	RP11-343H5.4	4
CH507-236L23.2	-2.76	MTND4P20	3.98
CH507-338C24.2	-2.76	RP11-333E13.2	3.91
RP11-574E24.3	-2.66	AC092569.2	3.91
APOC1P1	-2.62	AL590762.11	3.91
RP11-95M15.2	-2.55	RPL12P28	3.91
BNIP3P9	-2.54	GTF2IP9	3.81
AC005307.3	-2.5	ECEL1P2	3.76
RP11-259G18.3	-2.47	RP11-459D22.1	3.7
RP11-331F4.4	-2.46	PTMAP3	3.59
CTSLP2	-2.37	KRT16P2	3.59
SEPT14P2	-2.37	RP11-613E4.5	3.59
RP11-250H24.2	-2.34	RP11-757O6.6	3.59
GAPDHP74	-2.32	RP11-486A14.1	3.53
RP11-50D9.1	-2.31	RPL29P33	3.46
GGTLC5P	-2.31	RPS15AP11	3.32
AC004837.3	-2.3	RP11-430K21.2	3.32
BET1P1	-2.29	RP11-766H1.1	3.32
RP11-680E19.2	-2.29	RP11-1012A1.7	3.32
AC132008.1	-2.26	RP11-480N24.4	3.32
HNRNPA1P70	-2.25	IGHV1OR15-3	3.32
IGLV1-41	-2.2	AMYP1	3.32
RP11-1036E20.7	-2.18	RPL23AP77	3.32
RP11-484D2.3	-2.14	RP11-565J7.1	3.32
RPS26P28	-2.14	AC007000.10	3.17
ANKRD20A7P	-2.11	AC090954.5	3.17
RP11-20O24.1	-2.11	RP11-719K4.3	3.14
CYP21A1P	-2.11	KRT16P1	3
RPL36P4	-2.08	RP11-2C24.5	3
COX5BP7	-2.03	AC096579.13	3
HMGB1P35	-2.03	TSSK1A	3
GAPDHP32	-2.03	RP1-179N16.3	3
CTD-2287O16.1	-2.01	AC005740.3	3
PTGES3P2	-2	AC110299.5	2.81
RP11-756A22.7	-1.98	MTND4P19	2.81
RP11-57B24.1	-1.94	RP11-732A19.1	2.81
CR848007.2	-1.94	RP11-579D7.8	2.81
RP1-159A19.3	-1.94	RPL12P27	2.81
DDX11L9	-1.94	AC098828.3	2.81
RP11-16F15.2	-1.93	RP11-161H23.10	2.81
RP11-271K11.5	-1.92	CPHL1P	2.68
TRAV35	-1.9	RPS10P3	2.59
TDH	-1.9	RP11-154P18.2	2.59
SIGLEC22P	-1.88	PPIAP19	2.59
ADGRE4P	-1.88	RP11-173A8.2	2.59
RPL21P39	-1.88	CH507-42P11.2	2.59
AL353898.1	-1.87	IGLL3P	2.59
NAPSB	-1.87	PVRIG2P	2.59
ZNF209P	-1.85	KRT19P1	2.59
HMGB1P1	-1.83	ATP5G1P5	2.59
FTH1P22	-1.83	MUC2	2.59
RP5-903E17.2	-1.82	PTCHD3P2	2.59
RP11-958N24.2	-1.81	FCF1P7	2.59
ULK4P3	-1.8	AC010150.1	2.59
ZNF300P1	-1.8	CTD-2501B8.5	2.59
FTH1P1	-1.8	GS1-259H13.7	2.59
RHOXF1P1	-1.8	RPL7P16	2.59
RP11-368J21.3	-1.79	AC009238.7	2.51
RP3-476K8.4	-1.79	AC009237.17	2.51
RP11-974F13.5	-1.78	AC005077.14	2.4
RP11-497H16.7	-1.78	IFNWP19	2.36
TMSB4XP6	-1.77	TPSP2	2.32
RP11-182J1.14	-1.76	AZGP1P1	2.32
GLYATL1P1	-1.76	HSP90AA6P	2.32
EEF1A1P24	-1.76	RPL36AP43	2.32
RPS3AP25	-1.76	NT5C3AP1	2.32
PKD1P5	-1.74	RP11-403I13.10	2.32
RP4-612B18.3	-1.73	NACAP3	2.32
NSFP1	-1.72	RP11-205A8.3	2.32
HMGB3P10	-1.72	RPSAP53	2.32
OR52K3P	-1.71	RPL18P10	2.32
GGT3P	-1.71	FER1L4	2.32
CTD-2248H3.1	-1.71	KB-1269D1.8	2.32
RP11-466C23.5	-1.71	PSMD10P2	2.27
RP11-270C12.3	-1.7	RP11-757F18.3	2.24
FTLP3	-1.7	RP3-465N24.5	2.09
ACTG1P14	-1.69	CYP2B7P	2.06
RP11-592N21.1	-1.68	CDC42P3	2
RPL7AP64	-1.68	RP11-720N19.1	2
XXbac-BPG248L24.12	-1.68	KRT89P	2
RPL21P119	-1.66	ZMYND19P1	2
RP11-848G14.5	-1.66	PHBP2	2
BNIP3P17	-1.65	CTB-134H23.3	2
KRT17P2	-1.65	COL6A4P1	2
RP11-386I23.1	-1.65	KRT17P4	2
RP11-360D2.2	-1.63	OR10V2P	2
CTD-2224J9.4	-1.62	RP11-64K12.1	2
YBX1P6	-1.62	TSSK5P	2
ADAMTS7P1	-1.62	HMGB3P14	2
RHOQP3	-1.61	RP11-356M20.1	1.99
RPS4XP14	-1.61	RP1-34B20.4	1.96
DDX11L2	-1.6	TPM3P6	1.91
GYG2P1	-1.6	RP11-989E6.13	1.88
RP11-168A11.4	-1.6	ACTG1P10	1.88
ASLP1	-1.59	HSPE1P3	1.87
NOP56P3	-1.59	LINC00431	1.87
bP-2189O9.2	-1.58	RP11-758N13.3	1.83
AC013271.3	-1.58	MROH3P	1.83
TRGV7	-1.58	SLC35E1P1	1.81
RP11-587D21.1	-1.58	RPL12P8	1.81
RP11-1134I14.4	-1.57	BMPR1APS2	1.8
LINC00674	-1.56	C1DP1	1.78
THEMIS3P	-1.54	RAD17P1	1.74
AGGF1P1	-1.54	HLA-V	1.66
EIF3FP1	-1.54	CDIPT-AS1	1.63
EFTUD1P1	-1.54	ACTBP13	1.59
KRT16P6	-1.54	KRT16P3	1.59
RP11-109L13.1	-1.53	KRT18P15	1.59
FTH1P10	-1.53	NCAPD2P1	1.59
AC079922.2	-1.52	SEPHS1P1	1.59
NAP1L1P1	-1.51	RP11-549B18.3	1.59
HLA-DRB6	-1.51	AQP7P2	1.59
RP3-423B22.5	-1.51	SAPCD2P3	1.59
RP11-366M4.1	-1.51	ATP5C1P1	1.59
RPL36AP26	-1.49	LYPLA2P2	1.59
RP11-151F5.2	-1.49	TRAPPC13P1	1.59
RP11-102M11.1	-1.49	CAP2P1	1.59
RP11-402J6.3	-1.49	HNRNPA1P36	1.59
RP11-288E14.2	-1.48	UNGP3	1.59
NPM1P21	-1.48	AC092641.2	1.59
VN1R85P	-1.48	RP11-575G13.2	1.59
EEF1A1P29	-1.48	PCGF7P	1.59
PPIAP31	-1.48	MTND5P25	1.59
RP11-407P2.1	-1.47	NDUFA9P1	1.59
ESPNP	-1.47	RPSAP16	1.59
ARPC3P1	-1.47	RPL3P9	1.59
ERVFRD-3	-1.46	KRT18P39	1.59
RP13-258O15.1	-1.46	RP11-175B9.2	1.59
EIF4A1P4	-1.46	ENPP7P8	1.59
ACTBP2	-1.46	TRIM80P	1.59
RP11-467L13.5	-1.46	RP11-48O20.5	1.59
RP11-613M5.2	-1.45	ACTBP9	1.59
AC006033.22	-1.45	AP005901.1	1.59
RP11-707G14.8	-1.45	FOLH1B	1.59
TMSB4XP8	-1.45	MTCYBP21	1.59
CTC-260E6.2	-1.45	HIST2H2BC	1.57
TRPC2	-1.45	RP11-12A20.6	1.56
PYY2	-1.43	GUCY1B2	1.56
RPL7AP28	-1.43	HSPE1P2	1.56
HILS1	-1.42	RP11-133N21.7	1.52
PGBD4P3	-1.42	OR7E22P	1.52
CICP18	-1.42	RP11-481A20.10	1.49
SLED1	-1.42	NUS1P2	1.49
CYP51A1P1	-1.42	ANXA2P1	1.48
GPAA1P1	-1.41	WTAPP1	1.47
HIGD1AP11	-1.41	RP11-295H24.3	1.42
OR2I1P	-1.41	AURKAPS1	1.42
RP1-40G4P.1	-1.41	RP11-395L14.17	1.42
HSPB1P1	-1.4	ATP5G1P4	1.42
RPL32P1	-1.39	CMB9-55F22.1	1.41
RP1-241P17.4	-1.39	CHCHD4P3	1.37
CTD-2561J22.2	-1.39	AADACP1	1.36
RP11-76H14.2	-1.39	AK4P1	1.34
RPS26P3	-1.39	KRT18P7	1.33
GGT4P	-1.38	NBEAP3	1.33
HSPA7	-1.38	AKR7L	1.33
LINC01529	-1.38	ACTG1P15	1.33
PDLIM1P1	-1.38	RP11-424C20.2	1.32
DPRXP4	-1.37	CFL1P5	1.31
FTH1P11	-1.37	AC068522.4	1.31
USP32P1	-1.36	AC009237.11	1.3
GPX1P1	-1.36	NDUFB8P2	1.3
CTD-2319I12.10	-1.36	RP4-657E11.10	1.29
CYP4F23P	-1.36	AC005534.6	1.27
RASA4DP	-1.36	RNF126P1	1.27
NME2P1	-1.35	RPSAP52	1.25
ALG1L13P	-1.35	UBA52P6	1.25
ENPP7P2	-1.35	RP11-27I1.6	1.24
PLEKHA3P1	-1.35	ARL4AP2	1.24
AC115617.2	-1.35	ARSEP1	1.23
RP11-301M17.1	-1.35	CTB-60B18.15	1.23
RP1-130G2.1	-1.34	ABCC6P1	1.21
VN1R42P	-1.34	FERP1	1.21
NPM1P9	-1.34	GTF2IP7	1.2
RP11-329A14.1	-1.33	FDX1P1	1.2
CSPG4P5	-1.33	AC012512.1	1.2
CTD-2270N23.1	-1.32	EIF4HP2	1.19
RPL37P2	-1.32	ZNF887P	1.18
RPS23P8	-1.32	ZDHHC8P1	1.17
RRN3P2	-1.31	RP11-480I12.5	1.17
RPL23AP25	-1.31	RP13-33H18.1	1.16
AP000936.1	-1.31	IGFL1P1	1.16
RPS12P21	-1.31	PSMC1P5	1.15
AC009245.3	-1.3	RP11-815J4.7	1.14
RP11-798K23.5	-1.3	RPL31P52	1.13
GGTA1P	-1.3	UBE2CP2	1.11
RP11-796G6.1	-1.3	ARMC10P1	1.1
RP11-203F10.6	-1.3	SORD2P	1.09
ENPP7P12	-1.29	RP11-381E24.1	1.07
RP11-1148O4.1	-1.29	IKBKGP1	1.06
ANAPC1P1	-1.29	RP13-401N8.3	1.06
RP3-340B19.2	-1.29	RP11-98J23.2	1.02
RPL21P11	-1.29	FAHD2P1	1.01
RPL31P11	-1.29	AP000344.4	1.01
RP11-395L14.13	-1.29	KRT87P	1.01
SEPT7P9	-1.29	ATF4P1	1.01
MXRA5Y	-1.29	KRT8P41	1.01
RPL7L1P3	-1.29	RP11-54D18.2	1.01
TMED10P1	-1.29	TOMM20P4	1.01
SNX18P12	-1.29	CTC-471F3.5	1.01
HMGN1P38	-1.28	ETF1P2	1.01
RPLP0P2	-1.27	RP11-311D14.1	1.01
bP-21264C1.1	-1.27	RP11-747H7.1	1.01
RBM8B	-1.27	RP11-369K16.1	1.01
RPL21P7	-1.26	CLCA3P	1.01
CDK2AP2P2	-1.26	RP11-244J10.1	1.01
DFFBP1	-1.26	RP11-635N19.2	1.01
RP11-1094M14.8	-1.26	KRT18P34	1.01
RPS18P12	-1.25	RP13-210D15.8	1.01
RPL12P14	-1.25	ZNF833P	1.01
DAP3P2	-1.25	LRRC37A9P	1.01
PFN1P1	-1.25	AC097523.1	1.01
RP3-393E18.1	-1.25	MGAT4EP	1.01
NPM1P32	-1.24	CASC4P1	1.01
DHX40P1	-1.24	RPS27P25	1.01
LGMNP1	-1.23	FBXW11P1	1.01
BTG1P1	-1.23	RP11-21G15.1	1.01
TIMM8AP1	-1.23	BEND3P1	1.01
HSPB1P2	-1.23	KARSP2	1.01
AC006116.27	-1.22	TUBG1P	1.01
RPS20P14	-1.22	ECEL1P1	1.01
RP11-435F13.2	-1.22	RP11-44D5.1	1.01
RP11-25I15.1	-1.21	CTB-167G5.3	1.01
RPS4XP2	-1.21	NHP2P1	1.01
AC104843.3	-1.2	RPSAP69	1.01
RPS15AP38	-1.2	RP11-393N4.2	1.01
RP11-100N21.1	-1.2	TPTE2P2	1.01
FAM35DP	-1.2	BMS1P7	1.01
RP11-983G14.3	-1.19	FAM86GP	1.01
TAS2R18	-1.19	RP11-554D14.2	1.01
EEF1GP5	-1.19	CTD-2165H16.3	1.01
AC010132.11	-1.19	HNRNPA1P27	1.01
RP11-262H14.5	-1.19	YWHAEP7	1.01
RPS8P10	-1.19	TTC4P1	1.01
PFN1P4	-1.18	FAR2P1	1.01
AC010468.1	-1.18	DDX3P1	1.01
RPL23AP49	-1.18	KDELC1P1	1.01
RPL14P3	-1.18	CIR1P2	1.01
RPL7P47	-1.18	EIF4A2P2	1.01
RPS23P6	-1.18	ATF4P2	1.01
RP11-29H23.7	-1.18	LILRP2	1.01
RP11-157G21.2	-1.17	UBE2SP1	1
EEF1A1P19	-1.17
FCGR2C	-1.17
MTCO3P12	-1.17
RP11-113C12.4	-1.16
RP11-364L4.1	-1.16
AC008592.3	-1.16
ANKRD20A17P	-1.16
RP11-317N8.4	-1.16
TOMM20P2	-1.16
RP11-264F23.1	-1.16
VWFP1	-1.16
RP11-298C3.2	-1.15
USP32P3	-1.15
ST13P4	-1.15
RP4-803A2.2	-1.14
EEF1A1P4	-1.14
NOS2P3	-1.14
RP11-693N9.2	-1.14
BCORP1	-1.14
COL6A4P2	-1.14
RTN3P1	-1.14
GOLGA6L3	-1.14
RP11-206P5.2	-1.14
KNOP1P2	-1.14
RP11-326L17.1	-1.14
RP11-779O18.2	-1.14
RLIMP1	-1.14
RPL24P8	-1.14
LINC00264	-1.14
RPL31P49	-1.14
KRT223P	-1.14
RP11-673E1.3	-1.13
RP1-228P16.1	-1.13
ULK4P2	-1.13
HMGN2P15	-1.13
RAP1AP	-1.12
RP11-353N4.5	-1.12
BMS1P22	-1.12
CTC-471J1.10	-1.12
RPSAP17	-1.11
RPL26P19	-1.1
DUX4L27	-1.1
FAM187B2P	-1.1
PGAM1P7	-1.1
RPL13AP6	-1.1
RPL6P27	-1.09
RP11-1267H10.4	-1.08
CTD-2290P7.1	-1.08
RP11-401L13.4	-1.08
RP11-110J1.2	-1.08
CTD-2262B20.1	-1.08
FTLP2	-1.08
RPL7P21	-1.08
PRKY	-1.08
GAPDHP33	-1.08
AC078899.1	-1.08
UNC93B6	-1.08
AC064836.3	-1.08
RP11-330M2.4	-1.07
PFN1P8	-1.07
EEF1A1P11	-1.07
RP11-543P15.1	-1.07
NCF1C	-1.07
RAP2CP1	-1.06
E2F3P1	-1.06
RP11-486O13.5	-1.06
CTA-351J1.1	-1.06
FTH1P16	-1.06
HSPD1P11	-1.06
RP1-102E24.1	-1.05
RP11-26H16.1	-1.05
MTND5P11	-1.05
EEF1A1P9	-1.05
ZBTB8OSP2	-1.05
RP11-613F7.1	-1.04
RPS4XP17	-1.04
RPL7P50	-1.04
CDC42P4	-1.04
RP11-530A18.1	-1.04
RP11-137N23.1	-1.03
LYPLA2P1	-1.03
RP3-425P12.4	-1.03
POU5F1P3	-1.03
EIF3KP1	-1.03
CHCHD2P9	-1.03
CD8BP	-1.03
EEF1A1P22	-1.03
SEPT10P1	-1.03
RP11-488C13.1	-1.03
RP11-758I14.3	-1.03
GPS2P1	-1.03
RP11-64B16.2	-1.03
RPL13AP3	-1.03
AL590762.7	-1.03
RP11-366M4.11	-1.02
ZNF658B	-1.02
NANOGP7	-1.02
RPS3AP44	-1.02
YES1P1	-1.02
RP11-627K11.1	-1.02
CEP170P1	-1.02
RPS15P5	-1.02
RP11-603B24.1	-1.01
AQP7P1	-1.01
RP1-278E11.3	-1.01
SSR4P1	-1.01
NPM1P25	-1.01
RP11-848G14.2	-1.01
SETP14	-1
