# Supplementary material for: Pseudogene AK4P1 promotes pancreatic ductal adenocarcinoma progression through relieving miR-375-mediated YAP1 degradation
Source: Aging (Albany NY). 2022 Feb 27;14(4):1983–2003. doi: 10.18632/aging.203921 (PMC8908928; doi:10.18632/aging.203921)
Supplement: Supplementary Table 2 [file aging-14-203921-s003.xlsx]

## Sheet: Supplementary Table 2
Supplementary Table 2. Potential binding miRNA of AK4P1 in PDAC predicted by starBase database.
miRNAid	miRNAname	geneID	geneName	geneType	chromosome	start	end	strand	clipExpNum	degraExpNum	RBP	merClass	miRseq	align	targetSeq	pancancerNum	R	P-value
MIMAT0019704	hsa-miR-4644	ENSG00000263535	AK4P1	processed_pseudogene	chr17	29672620	29672642	+	1	0	AGO1-4	8mer	gaAGACAGAGAAAAGAGAGAGGu	|: ||||| |||||||	cuUUGGUCUCCAGCAUCUCUCCa	2	0.032	0.672
MIMAT0000455	hsa-miR-185-5p	ENSG00000263535	AK4P1	processed_pseudogene	chr17	29672621	29672642	+	1	0	AGO1-4	8mer	aguccuugacggaaAGAGAGGu	|||||||	uuuggucuccagcaUCUCUCCa	5	-0.004	0.962
MIMAT0016858	hsa-miR-4306	ENSG00000263535	AK4P1	processed_pseudogene	chr17	29672626	29672642	+	1	0	AGO1-4	8mer	augacggaaAGAGAGGu	|||||||	ucuccagcaUCUCUCCa	3	0.02	0.793
MIMAT0002826	hsa-miR-515-5p	ENSG00000263535	AK4P1	processed_pseudogene	chr17	29672747	29672772	+	1	0	AGO1-4	8mer	gucuuUCACGAAAG--AAAACCUCUu	| || | || |||||||	cgccuAAUGAUGUCCGAGUUGGAGAa	1	-0.033	0.659
MIMAT0002828	hsa-miR-519e-5p	ENSG00000263535	AK4P1	processed_pseudogene	chr17	29672752	29672772	+	1	0	AGO1-4	8mer	cuuucACGAGGGAAAACCUCUu	|| ||| |||||||	aaugaUG-UCCGAGUUGGAGAa	2	-0.064	0.393
MIMAT0019798	hsa-miR-4701-5p	ENSG00000263535	AK4P1	processed_pseudogene	chr17	29672764	29672785	+	1	0	AGO1-4	7mer-m8	uuccccauccacacCACCGGUu	|||||||	guuggagaauaggcGUGGCCAg	2	0.013	0.859
MIMAT0003255	hsa-miR-588	ENSG00000263535	AK4P1	processed_pseudogene	chr17	29672765	29672785	+	1	0	AGO1-4	7mer-m8	caagauuggguaaCACCGGUu	|||||||	uuggagaauaggcGUGGCCAg	1	0.001	0.989
MIMAT0002823	hsa-miR-512-3p	ENSG00000263535	AK4P1	processed_pseudogene	chr17	29672768	29672790	+	1	0	AGO1-4	7mer-m8	cuggaGUCGAUACU-GUCGUGAa	:|| :||: |||||||	gagaaUAGGCGUGGCCAGCACUg	1	0.088	0.242
MIMAT0017950	hsa-miR-2355-3p	ENSG00000263535	AK4P1	processed_pseudogene	chr17	29672803	29672825	+	9	0	AGO1-4	7mer-m8	uaGAGG--UUUGUCGUUCCUGUUa	:||| ::||| : |||||||	uuUUCCUAGGACA-UUAGGACAAg	1	0.319	1.4e-05
MIMAT0018204	hsa-miR-676-3p	ENSG00000263535	AK4P1	processed_pseudogene	chr17	29672804	29672824	+	9	0	AGO1-4	8mer	uugaGUUGUUGGAAUCCUGUc	| | :|| ||||||||	uuucCUAGGACAUUAGGACAa	5	-0.135	0.0727
MIMAT0004502	hsa-miR-28-3p	ENSG00000263535	AK4P1	processed_pseudogene	chr17	29672842	29672863	+	9	0	AGO1-4	7mer-m8	agguccucgagugUUAGAUCAc	:|||||||	aaucugugaagugGAUCUAGUg	3	0.322	1.19e-05
MIMAT0000452	hsa-miR-154-5p	ENSG00000263535	AK4P1	processed_pseudogene	chr17	29672929	29672950	+	2	0	AGO1-4	7mer-m8	gcuuCCGUUGUGCCUAUUGGAu	|| |: :: |||||||	uagcGGAAGGGUAUAUAACCUg	4	0.017	0.823
MIMAT0002813	hsa-miR-493-5p	ENSG00000263535	AK4P1	processed_pseudogene	chr17	29672952	29672974	+	2	0	AGO1-4	7mer-m8	uuacuUUCGGAUG-GUACAUGUu	|| || | ||||||||	acuucAAUCCACCUCAUGUACAu	2	0.026	0.728
MIMAT0016847	hsa-miR-378c	ENSG00000263535	AK4P1	processed_pseudogene	chr17	29672986	29673011	+	3	0	AGO1-4	7mer-m8	gguGAGAAGACUGAGGU--UCAGGUCa	| || ||| ||| |||||||	cguCACUGGUGA-ACCAUUAGUCCAGc	3	0.263	0.000395
MIMAT0018932	hsa-miR-378f	ENSG00000263535	AK4P1	processed_pseudogene	chr17	29672988	29673011	+	3	0	AGO1-4	7mer-m8	gaaGACCG--AGGU--UCAGGUCa	||||: ||| |||||||	ucaCUGGUGAACCAUUAGUCCAGc	0	-0.049	0.518
MIMAT0000732	hsa-miR-378a-3p	ENSG00000263535	AK4P1	processed_pseudogene	chr17	29672989	29673011	+	3	0	AGO1-4	7mer-m8	cgGAAGACUGAGGU--UCAGGUCa	|| ||| ||| |||||||	caCUGGUGA-ACCAUUAGUCCAGc	3	0.173	0.0212
MIMAT0001339	hsa-miR-422a	ENSG00000263535	AK4P1	processed_pseudogene	chr17	29672989	29673011	+	3	0	AGO1-4	7mer-m8	cgGAAGAC-UGGGAUUCAGGUCa	|| || ||| | |||||||	caCUGGUGAACCAUUAGUCCAGc	0	0	1
MIMAT0018984	hsa-miR-378h	ENSG00000263535	AK4P1	processed_pseudogene	chr17	29672990	29673011	+	3	0	AGO1-4	7mer-m8	gguagACUGUGGU--UCAGGUCa	||| |||| |||||||	acuggUGA-ACCAUUAGUCCAGc	2	0	1
MIMAT0019074	hsa-miR-378i	ENSG00000263535	AK4P1	processed_pseudogene	chr17	29672990	29673011	+	3	0	AGO1-4	7mer-m8	ggaagAC-UGAGGAUCAGGUCa	|| || :||||||||	acuggUGAACCAUUAGUCCAGc	1	0.021	0.783
MIMAT0014999	hsa-miR-378b	ENSG00000263535	AK4P1	processed_pseudogene	chr17	29672991	29673011	+	3	0	AGO1-4	7mer-m8	aagacggaGGU--UCAGGUCa	||| |||||||	cuggugaaCCAUUAGUCCAGc	1	0.139	0.0643
MIMAT0018926	hsa-miR-378d	ENSG00000263535	AK4P1	processed_pseudogene	chr17	29672991	29673011	+	3	0	AGO1-4	7mer-m8	aaagACUGAGGU--UCAGGUCa	||| ||| |||||||	cuggUGA-ACCAUUAGUCCAGc	1	0.187	0.0125
MIMAT0018927	hsa-miR-378e	ENSG00000263535	AK4P1	processed_pseudogene	chr17	29672992	29673011	+	3	0	AGO1-4	7mer-m8	aggACUGAGGU--UCAGGUCa	||| ||| |||||||	uggUGA-ACCAUUAGUCCAGc	0	0	1
MIMAT0000722	hsa-miR-370-3p	ENSG00000263535	AK4P1	processed_pseudogene	chr17	29672994	29673015	+	3	0	AGO1-4	8mer	ugguccaaGGUGGGGUCGUCCg	::| :||||||||	gugaaccaUUAGUCCAGCAGGa	1	0.03	0.692
MIMAT0027687	hsa-miR-6893-3p	ENSG00000263535	AK4P1	processed_pseudogene	chr17	29672994	29673015	+	3	0	AGO1-4	8mer	gaccguccACUUCCGUCGUCCc	| |: |||||||	gugaaccaUUAGUCCAGCAGGa	0	0	1
MIMAT0004810	hsa-miR-629-5p	ENSG00000263535	AK4P1	processed_pseudogene	chr17	29673008	29673029	+	4	0	AGO1-4	7mer-m8	ucaagagggUUGC-AUUUGGGu	:|:| |||||||	cagcaggagGAUGAUAAACCCg	2	0.164	0.0286
MIMAT0002173	hsa-miR-483-3p	ENSG00000263535	AK4P1	processed_pseudogene	chr17	29673087	29673107	+	2	0	AGO1-4	7mer-m8	uucUGCCCUCCUCUCCUCACu	|| ||| ||||||||	uauACAAGAGCCGAGGAGUGc	4	0.044	0.56
MIMAT0000728	hsa-miR-375	ENSG00000263535	AK4P1	processed_pseudogene	chr17	29673118	29673139	+	2	0	AGO1-4	8mer	aguGCGCUCGGCU-UGCUUGUUu	|| || | || ||||||||	uucCG-GAACGGAGACGAACAAa	13	-0.263	0.000387
MIMAT0019699	hsa-miR-4640-5p	ENSG00000263535	AK4P1	processed_pseudogene	chr17	29673127	29673149	+	2	0	AGO1-4	7mer-m8	ggguggucgacgagGGACCGGGu	:|||||||	ggagacgaacaaaaUCUGGCCCu	0	0.118	0.115
MIMAT0019845	hsa-miR-4726-5p	ENSG00000263535	AK4P1	processed_pseudogene	chr17	29673127	29673149	+	2	0	AGO1-4	7mer-m8	ggugagguccgaggAGACCGGGa	||||||||	ggagacgaacaaaaUCUGGCCCu	3	0.036	0.63
MIMAT0005794	hsa-miR-1296-5p	ENSG00000263535	AK4P1	processed_pseudogene	chr17	29673130	29673151	+	2	0	AGO1-4	7mer-m8	ccucuaccucggucCCGGGAUu	|||||||	gacgaacaaaaucuGGCCCUAc	10	-0.03	0.694
MIMAT0005923	hsa-miR-1269a	ENSG00000263535	AK4P1	processed_pseudogene	chr17	29673174	29673195	+	4	0	AGO1-4	8mer	ggucaucgugccGAGUCAGGUc	:||||||||	agaucacaccuaUUCAGUCCAa	1	-0.016	0.831
MIMAT0019059	hsa-miR-1269b	ENSG00000263535	AK4P1	processed_pseudogene	chr17	29673174	29673195	+	4	0	AGO1-4	8mer	ggucaucguaccGAGUCAGGUc	:||||||||	agaucacaccuaUUCAGUCCAa	1	0.039	0.602
