# Supplementary material for: Pseudogene AK4P1 promotes pancreatic ductal adenocarcinoma progression through relieving miR-375-mediated YAP1 degradation
Source: Aging (Albany NY). 2022 Feb 27;14(4):1983–2003. doi: 10.18632/aging.203921 (PMC8908928; doi:10.18632/aging.203921)
Supplement: Supplementary Table 3 [file aging-14-203921-s004.xlsx]

## Sheet: Supplementary Table 3
Supplementary Table 3. Potential target genes of miR-375 in PDAC predicted by miRNet database.
ID	Accession	Target	TargetID	Experiment	Literature	Tissue
hsa-mir-375	MIMAT0000728	PARP1	142	Microarray//qRT-PCR	20584986	Pancreas
hsa-mir-375	MIMAT0000728	JAG1	182	Microarray	20215506	Pancreas
hsa-mir-375	MIMAT0000728	BIRC3	330	Microarray	20215506	Pancreas
hsa-mir-375	MIMAT0000728	XIAP	331	HITS-CLIP	23824327	Pancreas
hsa-mir-375	MIMAT0000728	RHOA	387	Microarray//qRT-PCR//Western blot	20584986	Pancreas
hsa-mir-375	MIMAT0000728	ARHGDIA	396	PAR-CLIP	26701625	Pancreas
hsa-mir-375	MIMAT0000728	AXL	558	Microarray	20215506	Pancreas
hsa-mir-375	MIMAT0000728	BAK1	578	Microarray	20215506	Pancreas
hsa-mir-375	MIMAT0000728	BCL2	596	Microarray//qRT-PCR	20584986	Pancreas
hsa-mir-375	MIMAT0000728	ZFP36L2	678	Microarray	20215506	Pancreas
hsa-mir-375	MIMAT0000728	C1QBP	708	Microarray//Reporter assay	20215506|15806104	Pancreas
hsa-mir-375	MIMAT0000728	CALU	813	Microarray	20215506	Pancreas
hsa-mir-375	MIMAT0000728	CASP3	836	Microarray//qRT-PCR	20584986	Pancreas
hsa-mir-375	MIMAT0000728	RUNX3	864	Luciferase reporter assay//qRT-PCR//Western blot	26170936	Pancreas
hsa-mir-375	MIMAT0000728	CDC42	998	Microarray//qRT-PCR	20584986	Pancreas
hsa-mir-375	MIMAT0000728	CDKN2B	1030	Microarray	20215506	Pancreas
hsa-mir-375	MIMAT0000728	CDR2	1039	Microarray	20215506	Pancreas
hsa-mir-375	MIMAT0000728	CENPF	1063	Microarray	20215506	Pancreas
hsa-mir-375	MIMAT0000728	CFL2	1073	Microarray	20215506	Pancreas
hsa-mir-375	MIMAT0000728	CTSC	1075	Microarray	20215506	Pancreas
hsa-mir-375	MIMAT0000728	CHGB	1114	Microarray	20215506	Pancreas
hsa-mir-375	MIMAT0000728	CNN3	1266	Microarray	20215506	Pancreas
hsa-mir-375	MIMAT0000728	COL12A1	1303	Microarray	20215506	Pancreas
hsa-mir-375	MIMAT0000728	MAP3K8	1326	Luciferase reporter assay//Western blot	23430746|28186962	Pancreas
hsa-mir-375	MIMAT0000728	CPOX	1371	Microarray	20215506	Pancreas
hsa-mir-375	MIMAT0000728	CRABP2	1382	Microarray	20215506	Pancreas
hsa-mir-375	MIMAT0000728	CSTF2	1478	Microarray	20215506	Pancreas
hsa-mir-375	MIMAT0000728	CTGF	1490	Microarray	20215506	Pancreas
hsa-mir-375	MIMAT0000728	CTNNB1	1499	Luciferase reporter assay	28158288	Pancreas
hsa-mir-375	MIMAT0000728	CXADR	1525	Microarray	20215506	Pancreas
hsa-mir-375	MIMAT0000728	TIMM8A	1678	Immunohistochemistry//Luciferase reporter assay//Microarray//Northern blot//qRT-PCR	19734348|19807270	Pancreas
hsa-mir-375	MIMAT0000728	DLG4	1742	Microarray//qRT-PCR	20584986	Pancreas
hsa-mir-375	MIMAT0000728	DNMT3B	1789	Microarray	20215506	Pancreas
hsa-mir-375	MIMAT0000728	DPYSL3	1809	Microarray	20215506	Pancreas
hsa-mir-375	MIMAT0000728	DR1	1810	Microarray	20215506	Pancreas
hsa-mir-375	MIMAT0000728	DUSP6	1848	Microarray	20215506	Pancreas
hsa-mir-375	MIMAT0000728	DUT	1854	Microarray	20215506	Pancreas
hsa-mir-375	MIMAT0000728	EFNB2	1948	Microarray	20215506	Pancreas
hsa-mir-375	MIMAT0000728	EIF2S1	1965	HITS-CLIP//Microarray//PAR-CLIP	20215506|21572407|23824327	Pancreas
hsa-mir-375	MIMAT0000728	EIF4EBP2	1979	Microarray	20215506	Pancreas
hsa-mir-375	MIMAT0000728	ELAVL2	1993	PAR-CLIP	21572407	Pancreas
hsa-mir-375	MIMAT0000728	ELAVL4	1996	GFP reporter assay//Immunohistochemistry//Microarray//qRT-PCR//Reporter assay//Western blot	20584986	Pancreas
hsa-mir-375	MIMAT0000728	EMP1	2012	Microarray	20215506	Pancreas
hsa-mir-375	MIMAT0000728	ERBB2	2064	Flow//HITS-CLIP//Luciferase reporter assay//qRT-PCR//Western blot	24926380|24906430|26893657	Pancreas
hsa-mir-375	MIMAT0000728	EXT1	2131	Microarray	20215506	Pancreas
hsa-mir-375	MIMAT0000728	F3	2152	Microarray	20215506	Pancreas
hsa-mir-375	MIMAT0000728	ACSL3	2181	Microarray	20215506	Pancreas
hsa-mir-375	MIMAT0000728	ACSL4	2182	Microarray	20215506	Pancreas
hsa-mir-375	MIMAT0000728	FAH	2184	Microarray	20215506	Pancreas
hsa-mir-375	MIMAT0000728	FKBP1A	2280	Microarray	20215506	Pancreas
hsa-mir-375	MIMAT0000728	FKBP1B	2281	Microarray	20215506	Pancreas
hsa-mir-375	MIMAT0000728	FOLR1	2348	Microarray	20215506	Pancreas
hsa-mir-375	MIMAT0000728	KDSR	2531	Microarray	20215506	Pancreas
hsa-mir-375	MIMAT0000728	IFI6	2537	Microarray	20215506	Pancreas
hsa-mir-375	MIMAT0000728	GAS8	2622	Microarray	20215506	Pancreas
hsa-mir-375	MIMAT0000728	GATA6	2627	Microarray//PAR-CLIP	20215506|21572407	Pancreas
hsa-mir-375	MIMAT0000728	GOLGA4	2803	Microarray	20215506	Pancreas
hsa-mir-375	MIMAT0000728	RAPGEF1	2889	Microarray	20215506	Pancreas
hsa-mir-375	MIMAT0000728	HK2	3099	Microarray	20215506	Pancreas
hsa-mir-375	MIMAT0000728	MR1	3140	Microarray	20215506	Pancreas
hsa-mir-375	MIMAT0000728	HOXB3	3213	PAR-CLIP	21572407	Pancreas
hsa-mir-375	MIMAT0000728	HSP90AA1	3320	Microarray	20215506	Pancreas
hsa-mir-375	MIMAT0000728	NDST1	3340	Microarray	20215506	Pancreas
hsa-mir-375	MIMAT0000728	SP110	3431	Microarray	20215506	Pancreas
hsa-mir-375	MIMAT0000728	IFIT1	3434	Microarray	20215506	Pancreas
hsa-mir-375	MIMAT0000728	IGF1R	3480	Luciferase reporter assay//qRT-PCR//Western blot	24571711	Pancreas
hsa-mir-375	MIMAT0000728	IGFBP3	3486	Microarray	20215506	Pancreas
hsa-mir-375	MIMAT0000728	RBPJ	3516	Microarray	20215506	Pancreas
hsa-mir-375	MIMAT0000728	IL1RAP	3556	Microarray	20215506	Pancreas
hsa-mir-375	MIMAT0000728	ITGB1	3688	Microarray//qRT-PCR	20584986	Pancreas
hsa-mir-375	MIMAT0000728	ITIH4	3700	Microarray	20215506	Pancreas
hsa-mir-375	MIMAT0000728	JAK2	3717	Immunohistochemistry//Luciferase reporter assay//qRT-PCR//Reporter assay//Western blot	20548334|15806104|24718681|25055044|28186962|28006751	Pancreas
hsa-mir-375	MIMAT0000728	KCNN4	3783	Microarray	20215506	Pancreas
hsa-mir-375	MIMAT0000728	KCNQ2	3785	Microarray//qRT-PCR//Western blot	20584986	Pancreas
hsa-mir-375	MIMAT0000728	KHK	3795	Microarray	20215506	Pancreas
hsa-mir-375	MIMAT0000728	KPNA4	3840	Microarray	20215506	Pancreas
hsa-mir-375	MIMAT0000728	KRT8	3856	Microarray	20215506	Pancreas
hsa-mir-375	MIMAT0000728	LDHB	3945	Immunohistochemistry//Luciferase reporter assay//Microarray//qRT-PCR//QRTPCR//Western blot	20215506|23497265|22752059	Pancreas
hsa-mir-375	MIMAT0000728	LRP5	4041	Luciferase reporter assay	28158288	Pancreas
hsa-mir-375	MIMAT0000728	MRE11	4361	Microarray	20215506	Pancreas
hsa-mir-375	MIMAT0000728	MST1R	4486	Luciferase reporter assay//qRT-PCR//Western blot	27689991	Pancreas
hsa-mir-375	MIMAT0000728	MYBL1	4603	Microarray	20215506	Pancreas
hsa-mir-375	MIMAT0000728	MYC	4609	TRAP	24510096	Pancreas
hsa-mir-375	MIMAT0000728	MYCN	4613	Luciferase reporter assay//qRT-PCR//Western blot	25864587	Pancreas
hsa-mir-375	MIMAT0000728	NCAM1	4684	Microarray//qRT-PCR	20584986	Pancreas
hsa-mir-375	MIMAT0000728	NPPB	4879	Microarray	20215506	Pancreas
hsa-mir-375	MIMAT0000728	ODF2	4957	Microarray	20215506	Pancreas
hsa-mir-375	MIMAT0000728	OPA1	4976	Microarray	20215506	Pancreas
hsa-mir-375	MIMAT0000728	OTX1	5013	Microarray	20215506	Pancreas
hsa-mir-375	MIMAT0000728	PEBP1	5037	Microarray	20215506	Pancreas
hsa-mir-375	MIMAT0000728	PAFAH1B1	5048	Microarray	20215506	Pancreas
hsa-mir-375	MIMAT0000728	PAFAH2	5051	Microarray	20215506	Pancreas
hsa-mir-375	MIMAT0000728	PRDX1	5052	Microarray	20215506	Pancreas
hsa-mir-375	MIMAT0000728	PDK1	5163	Immunohistochemistry//Luciferase reporter assay//qRT-PCR//Western blot	21533613|20215506|24137444|24481267	Pancreas
hsa-mir-375	MIMAT0000728	PIK3CA	5290	Luciferase reporter assay//qRT-PCR//Quantitative proteomic approach//Western blot	24440701	Pancreas
hsa-mir-375	MIMAT0000728	PLAG1	5324	Luciferase reporter assay	19347935	Pancreas
hsa-mir-375	MIMAT0000728	PPP1R2	5504	Microarray	20215506	Pancreas
hsa-mir-375	MIMAT0000728	PRKCA	5578	Microarray	20215506	Pancreas
hsa-mir-375	MIMAT0000728	MAPK3	5595	Western blot	28186962	Pancreas
hsa-mir-375	MIMAT0000728	EIF2AK2	5610	Microarray//qRT-PCR	20584986	Pancreas
hsa-mir-375	MIMAT0000728	PRKX	5613	Microarray	20215506	Pancreas
hsa-mir-375	MIMAT0000728	KLK10	5655	Microarray	20215506	Pancreas
hsa-mir-375	MIMAT0000728	PTPN1	5770	Microarray	20215506	Pancreas
hsa-mir-375	MIMAT0000728	PTPN12	5782	Microarray	20215506	Pancreas
hsa-mir-375	MIMAT0000728	RAB3B	5865	Microarray	20215506	Pancreas
hsa-mir-375	MIMAT0000728	RAB6A	5870	Microarray	20215506	Pancreas
hsa-mir-375	MIMAT0000728	RBBP8	5932	Microarray	20215506	Pancreas
hsa-mir-375	MIMAT0000728	RCN2	5955	Microarray	20215506	Pancreas
hsa-mir-375	MIMAT0000728	RLF	6018	Microarray	20215506	Pancreas
hsa-mir-375	MIMAT0000728	RPGR	6103	Microarray	20215506	Pancreas
hsa-mir-375	MIMAT0000728	RPN1	6184	Microarray	20215506	Pancreas
hsa-mir-375	MIMAT0000728	RPN2	6185	Microarray	20215506	Pancreas
hsa-mir-375	MIMAT0000728	RTN2	6253	Microarray	20215506	Pancreas
hsa-mir-375	MIMAT0000728	SDC1	6382	Microarray	20215506	Pancreas
hsa-mir-375	MIMAT0000728	MAP2K4	6416	Microarray	20215506	Pancreas
hsa-mir-375	MIMAT0000728	SET	6418	Microarray//PAR-CLIP	20215506|23592263	Pancreas
hsa-mir-375	MIMAT0000728	SLC6A6	6533	Microarray	20215506	Pancreas
hsa-mir-375	MIMAT0000728	SLC7A1	6541	PAR-CLIP	23592263	Pancreas
hsa-mir-375	MIMAT0000728	SNAPC1	6617	Microarray	20215506	Pancreas
hsa-mir-375	MIMAT0000728	SNRPA1	6627	Microarray	20215506	Pancreas
hsa-mir-375	MIMAT0000728	SON	6651	HITS-CLIP//PAR-CLIP	26701625|27292025|27418678	Pancreas
hsa-mir-375	MIMAT0000728	SOX2	6657	Flow//qRT-PCR	27800139	Pancreas
hsa-mir-375	MIMAT0000728	SP1	6667	Luciferase reporter assay//qRT-PCR//Western blot	21945323|23435408|25633534	Pancreas
hsa-mir-375	MIMAT0000728	STAT3	6774	Western blot	28186962	Pancreas
hsa-mir-375	MIMAT0000728	STX3	6809	Microarray	20215506	Pancreas
hsa-mir-375	MIMAT0000728	TAF2	6873	HITS-CLIP	19536157	Pancreas
hsa-mir-375	MIMAT0000728	TCF12	6938	Microarray	20215506	Pancreas
hsa-mir-375	MIMAT0000728	TFRC	7037	HITS-CLIP	23313552	Pancreas
hsa-mir-375	MIMAT0000728	TGFB2	7042	Microarray	20215506	Pancreas
hsa-mir-375	MIMAT0000728	TGM2	7052	Microarray	20215506	Pancreas
hsa-mir-375	MIMAT0000728	THRA	7067	Microarray	20215506	Pancreas
hsa-mir-375	MIMAT0000728	TNNI3	7137	Microarray	20215506	Pancreas
hsa-mir-375	MIMAT0000728	TNS1	7145	HITS-CLIP	19536157	Pancreas
hsa-mir-375	MIMAT0000728	TP53	7157	Flow//Luciferase reporter assay//qRT-PCR//Western blot	23835407	Pancreas
hsa-mir-375	MIMAT0000728	TPR	7175	Microarray	20215506	Pancreas
hsa-mir-375	MIMAT0000728	TRPS1	7227	HITS-CLIP	23824327	Pancreas
hsa-mir-375	MIMAT0000728	UBE3A	7337	Microarray//PAR-CLIP	20215506|21572407	Pancreas
hsa-mir-375	MIMAT0000728	UCHL3	7347	Microarray	20215506	Pancreas
hsa-mir-375	MIMAT0000728	UGCG	7357	Microarray	20215506	Pancreas
hsa-mir-375	MIMAT0000728	USP1	7398	Microarray//Reporter assay	20215506|15806104	Pancreas
hsa-mir-375	MIMAT0000728	YWHAZ	7534	Immunohistochemistry//Microarray//qRT-PCR//Reporter assay//Western blot	20215506|23422756	Pancreas
hsa-mir-375	MIMAT0000728	ALMS1	7840	Microarray	20215506	Pancreas
hsa-mir-375	MIMAT0000728	REEP5	7905	HITS-CLIP	27418678	Pancreas
hsa-mir-375	MIMAT0000728	DEK	7913	PAR-CLIP	20371350	Pancreas
hsa-mir-375	MIMAT0000728	CUL5	8065	Microarray	20215506	Pancreas
hsa-mir-375	MIMAT0000728	PTP4A2	8073	Microarray	20215506	Pancreas
hsa-mir-375	MIMAT0000728	PUDP	8226	Microarray	20215506	Pancreas
hsa-mir-375	MIMAT0000728	FZD4	8322	Microarray	20215506	Pancreas
hsa-mir-375	MIMAT0000728	FZD8	8325	Luciferase reporter assay	23393589|23396279	Pancreas
hsa-mir-375	MIMAT0000728	SPOP	8405	HITS-CLIP	23824327	Pancreas
hsa-mir-375	MIMAT0000728	EEA1	8411	Microarray	20215506	Pancreas
hsa-mir-375	MIMAT0000728	DGKD	8527	Microarray	20215506	Pancreas
hsa-mir-375	MIMAT0000728	AP3B1	8546	HITS-CLIP	19536157	Pancreas
hsa-mir-375	MIMAT0000728	NUMB	8650	Microarray	20215506	Pancreas
hsa-mir-375	MIMAT0000728	EIF4G3	8672	Microarray	20215506	Pancreas
hsa-mir-375	MIMAT0000728	DNAH11	8701	Microarray	20215506	Pancreas
hsa-mir-375	MIMAT0000728	B3GALNT1	8706	Microarray	20215506	Pancreas
hsa-mir-375	MIMAT0000728	TNFSF13	8741	Microarray	20215506	Pancreas
hsa-mir-375	MIMAT0000728	PEX11B	8799	Microarray	20215506	Pancreas
hsa-mir-375	MIMAT0000728	ASAP2	8853	Microarray	20215506	Pancreas
hsa-mir-375	MIMAT0000728	BCL10	8915	Microarray	20215506	Pancreas
hsa-mir-375	MIMAT0000728	BSN	8927	Microarray	20215506	Pancreas
hsa-mir-375	MIMAT0000728	MBD2	8932	Microarray	20215506	Pancreas
hsa-mir-375	MIMAT0000728	SPAG9	9043	Microarray	20215506	Pancreas
hsa-mir-375	MIMAT0000728	SLC7A6	9057	Microarray	20215506	Pancreas
hsa-mir-375	MIMAT0000728	CLDN1	9076	Microarray	20215506	Pancreas
hsa-mir-375	MIMAT0000728	TBX19	9095	Microarray	20215506	Pancreas
hsa-mir-375	MIMAT0000728	USP10	9100	Microarray	20215506	Pancreas
hsa-mir-375	MIMAT0000728	EXO1	9156	Microarray	20215506	Pancreas
hsa-mir-375	MIMAT0000728	EBAG9	9166	Microarray	20215506	Pancreas
hsa-mir-375	MIMAT0000728	ZBED1	9189	Microarray	20215506	Pancreas
hsa-mir-375	MIMAT0000728	XPR1	9213	Microarray	20215506	Pancreas
hsa-mir-375	MIMAT0000728	NOLC1	9221	Microarray	20215506	Pancreas
hsa-mir-375	MIMAT0000728	CRLF1	9244	Microarray	20215506	Pancreas
hsa-mir-375	MIMAT0000728	KLF4	9314	qRT-PCR//Western blot	27279635	Pancreas
hsa-mir-375	MIMAT0000728	EFTUD2	9343	Microarray	20215506	Pancreas
hsa-mir-375	MIMAT0000728	RAB28	9364	Microarray	20215506	Pancreas
hsa-mir-375	MIMAT0000728	HOMER2	9455	Microarray	20215506	Pancreas
hsa-mir-375	MIMAT0000728	AKAP7	9465	Microarray	20215506	Pancreas
hsa-mir-375	MIMAT0000728	PIGB	9488	Microarray	20215506	Pancreas
hsa-mir-375	MIMAT0000728	LITAF	9516	Microarray	20215506	Pancreas
hsa-mir-375	MIMAT0000728	RAB3D	9545	Microarray	20215506	Pancreas
hsa-mir-375	MIMAT0000728	WTAP	9589	Microarray	20215506	Pancreas
hsa-mir-375	MIMAT0000728	SEC24C	9632	Microarray	20215506	Pancreas
hsa-mir-375	MIMAT0000728	VGLL4	9686	Microarray	20215506	Pancreas
hsa-mir-375	MIMAT0000728	HERPUD1	9709	Microarray	20215506	Pancreas
hsa-mir-375	MIMAT0000728	PHACTR2	9749	PAR-CLIP	22012620	Pancreas
hsa-mir-375	MIMAT0000728	SNPH	9751	Microarray	20215506	Pancreas
hsa-mir-375	MIMAT0000728	MLEC	9761	Microarray	20215506	Pancreas
hsa-mir-375	MIMAT0000728	KIAA0513	9764	Microarray	20215506	Pancreas
hsa-mir-375	MIMAT0000728	KIAA0232	9778	Microarray	20215506	Pancreas
hsa-mir-375	MIMAT0000728	TBC1D5	9779	Microarray	20215506	Pancreas
hsa-mir-375	MIMAT0000728	RIMS3	9783	Microarray	20215506	Pancreas
hsa-mir-375	MIMAT0000728	SERTAD2	9792	Microarray	20215506	Pancreas
hsa-mir-375	MIMAT0000728	DAZAP2	9802	Microarray//PAR-CLIP	20215506|23592263	Pancreas
hsa-mir-375	MIMAT0000728	NUP58	9818	Microarray	20215506	Pancreas
hsa-mir-375	MIMAT0000728	TSC22D2	9819	Microarray	20215506	Pancreas
hsa-mir-375	MIMAT0000728	RB1CC1	9821	Microarray	20215506	Pancreas
hsa-mir-375	MIMAT0000728	ARHGAP11A	9824	Microarray	20215506	Pancreas
hsa-mir-375	MIMAT0000728	TRIM66	9866	PAR-CLIP	22100165	Pancreas
hsa-mir-375	MIMAT0000728	WDR1	9948	Microarray	20215506	Pancreas
hsa-mir-375	MIMAT0000728	AMMECR1	9949	Microarray	20215506	Pancreas
hsa-mir-375	MIMAT0000728	BCL2L11	10018	Microarray//qRT-PCR	20215506	Pancreas
hsa-mir-375	MIMAT0000728	CTDSP2	10106	Microarray	20215506	Pancreas
hsa-mir-375	MIMAT0000728	ABI2	10152	Microarray	20215506	Pancreas
hsa-mir-375	MIMAT0000728	SLC25A15	10166	Microarray	20215506	Pancreas
hsa-mir-375	MIMAT0000728	LHFPL2	10184	Microarray	20215506	Pancreas
hsa-mir-375	MIMAT0000728	STX6	10228	Microarray	20215506	Pancreas
hsa-mir-375	MIMAT0000728	GPHN	10243	ELISA//qRT-PCR	26013143	Pancreas
hsa-mir-375	MIMAT0000728	RIDA	10247	Microarray	20215506	Pancreas
hsa-mir-375	MIMAT0000728	FSTL3	10272	Microarray	20215506	Pancreas
hsa-mir-375	MIMAT0000728	BCAS2	10286	HITS-CLIP	19536157	Pancreas
hsa-mir-375	MIMAT0000728	RRAGB	10325	Microarray	20215506	Pancreas
hsa-mir-375	MIMAT0000728	YAP1	10413	Flow//Immunohistochemistry//Luciferase reporter assay//Microarray//qRT-PCR//Western blot	21856745|20215506|24892549|27832783	Pancreas
hsa-mir-375	MIMAT0000728	TIMM17A	10440	Microarray	20215506	Pancreas
hsa-mir-375	MIMAT0000728	FAM3C	10447	Microarray	20215506	Pancreas
hsa-mir-375	MIMAT0000728	HOXB13	10481	Microarray	20215506	Pancreas
hsa-mir-375	MIMAT0000728	SEC23A	10484	Flow//Immunohistochemistry//Microarray//qRT-PCR//Western blot	20215506|27832783	Pancreas
hsa-mir-375	MIMAT0000728	CREB3	10488	Microarray	20215506	Pancreas
hsa-mir-375	MIMAT0000728	SYNCRIP	10492	Microarray	20215506	Pancreas
hsa-mir-375	MIMAT0000728	UNC13B	10497	Microarray	20215506	Pancreas
hsa-mir-375	MIMAT0000728	SEMA3C	10512	Microarray	20215506	Pancreas
hsa-mir-375	MIMAT0000728	ATG7	10533	Microarray	20215506	Pancreas
hsa-mir-375	MIMAT0000728	PROCR	10544	Microarray	20215506	Pancreas
hsa-mir-375	MIMAT0000728	CELF2	10659	Microarray	20215506	Pancreas
hsa-mir-375	MIMAT0000728	AHCYL1	10768	Microarray	20215506	Pancreas
hsa-mir-375	MIMAT0000728	SEC24A	10802	HITS-CLIP	23313552	Pancreas
hsa-mir-375	MIMAT0000728	SDCCAG3	10807	PAR-CLIP	20371350	Pancreas
hsa-mir-375	MIMAT0000728	RAB10	10890	Microarray//qRT-PCR	20584986	Pancreas
hsa-mir-375	MIMAT0000728	SUB1	10923	Microarray	20215506	Pancreas
hsa-mir-375	MIMAT0000728	PRDX3	10935	Microarray	20215506	Pancreas
hsa-mir-375	MIMAT0000728	LMAN2	10960	Microarray	20215506	Pancreas
hsa-mir-375	MIMAT0000728	NUDT21	11051	Microarray	20215506	Pancreas
hsa-mir-375	MIMAT0000728	PSIP1	11168	Microarray	20215506	Pancreas
hsa-mir-375	MIMAT0000728	BAZ1A	11177	Microarray	20215506	Pancreas
hsa-mir-375	MIMAT0000728	RASSF8	11228	Microarray	20215506	Pancreas
hsa-mir-375	MIMAT0000728	CBX3	11335	PAR-CLIP	20371350|26701625|27292025	Pancreas
hsa-mir-375	MIMAT0000728	COG2	22796	Microarray	20215506	Pancreas
hsa-mir-375	MIMAT0000728	PHLDA1	22822	Microarray	20215506	Pancreas
hsa-mir-375	MIMAT0000728	DNAJC8	22826	Microarray	20215506	Pancreas
hsa-mir-375	MIMAT0000728	CHSY1	22856	Microarray	20215506	Pancreas
hsa-mir-375	MIMAT0000728	CARD8	22900	Microarray	20215506	Pancreas
hsa-mir-375	MIMAT0000728	ELL2	22936	Microarray	20215506	Pancreas
hsa-mir-375	MIMAT0000728	SLC4A1AP	22950	Microarray	20215506	Pancreas
hsa-mir-375	MIMAT0000728	NT5C2	22978	Microarray	20215506	Pancreas
hsa-mir-375	MIMAT0000728	DIP2C	22982	Microarray	20215506	Pancreas
hsa-mir-375	MIMAT0000728	STK38L	23012	Microarray	20215506	Pancreas
hsa-mir-375	MIMAT0000728	SAMD4A	23034	Microarray	20215506	Pancreas
hsa-mir-375	MIMAT0000728	ERP44	23071	Microarray	20215506	Pancreas
hsa-mir-375	MIMAT0000728	SIPA1L3	23094	Microarray	20215506	Pancreas
hsa-mir-375	MIMAT0000728	DCUN1D4	23142	Microarray	20215506	Pancreas
hsa-mir-375	MIMAT0000728	PSME4	23198	Microarray	20215506	Pancreas
hsa-mir-375	MIMAT0000728	PHLPP1	23239	Luciferase reporter assay//Northern blot//qRT-PCR//Western blot	24337069	Pancreas
hsa-mir-375	MIMAT0000728	WWC1	23286	Microarray	20215506	Pancreas
hsa-mir-375	MIMAT0000728	AGTPBP1	23287	Microarray	20215506	Pancreas
hsa-mir-375	MIMAT0000728	IQCE	23288	Microarray	20215506	Pancreas
hsa-mir-375	MIMAT0000728	ICOSLG	23308	HITS-CLIP	23824327	Pancreas
hsa-mir-375	MIMAT0000728	RPGRIP1L	23322	Microarray	20215506	Pancreas
hsa-mir-375	MIMAT0000728	DPY19L1	23333	Microarray	20215506	Pancreas
hsa-mir-375	MIMAT0000728	RHOQ	23433	Microarray	20215506	Pancreas
hsa-mir-375	MIMAT0000728	SLC35A3	23443	Microarray	20215506	Pancreas
hsa-mir-375	MIMAT0000728	HEY1	23462	Microarray	20215506	Pancreas
hsa-mir-375	MIMAT0000728	PHF3	23469	Microarray	20215506	Pancreas
hsa-mir-375	MIMAT0000728	LEPROTL1	23484	Microarray//qRT-PCR	20584986	Pancreas
hsa-mir-375	MIMAT0000728	SUZ12	23512	Microarray	20215506	Pancreas
hsa-mir-375	MIMAT0000728	TNPO3	23534	Microarray	20215506	Pancreas
hsa-mir-375	MIMAT0000728	GTPBP4	23560	Microarray	20215506	Pancreas
hsa-mir-375	MIMAT0000728	ARL2BP	23568	Microarray	20215506	Pancreas
hsa-mir-375	MIMAT0000728	CORO1C	23603	Microarray	20215506	Pancreas
hsa-mir-375	MIMAT0000728	MKRN1	23608	Microarray	20215506	Pancreas
hsa-mir-375	MIMAT0000728	SH3BP4	23677	Microarray	20215506	Pancreas
hsa-mir-375	MIMAT0000728	IL17RA	23765	Microarray	20215506	Pancreas
hsa-mir-375	MIMAT0000728	FBXO8	26269	Microarray	20215506	Pancreas
hsa-mir-375	MIMAT0000728	CKAP2	26586	Microarray	20215506	Pancreas
hsa-mir-375	MIMAT0000728	DNAJC2	27000	Microarray	20215506	Pancreas
hsa-mir-375	MIMAT0000728	ANKRD1	27063	Microarray	20215506	Pancreas
hsa-mir-375	MIMAT0000728	SERP1	27230	Microarray	20215506	Pancreas
hsa-mir-375	MIMAT0000728	SESN1	27244	Microarray	20215506	Pancreas
hsa-mir-375	MIMAT0000728	DESI1	27351	Microarray	20215506	Pancreas
hsa-mir-375	MIMAT0000728	MAT2B	27430	Microarray	20215506	Pancreas
hsa-mir-375	MIMAT0000728	C11orf54	28970	Microarray	20215506	Pancreas
hsa-mir-375	MIMAT0000728	CCDC59	29080	Microarray	20215506	Pancreas
hsa-mir-375	MIMAT0000728	SENP1	29843	Microarray	20215506	Pancreas
hsa-mir-375	MIMAT0000728	NRBP1	29959	Microarray	20215506	Pancreas
hsa-mir-375	MIMAT0000728	TMED5	50999	Microarray	20215506	Pancreas
hsa-mir-375	MIMAT0000728	PHF20L1	51105	Microarray	20215506	Pancreas
hsa-mir-375	MIMAT0000728	RDH11	51109	Microarray	20215506	Pancreas
hsa-mir-375	MIMAT0000728	INSIG2	51141	Microarray	20215506	Pancreas
hsa-mir-375	MIMAT0000728	JPT1	51155	Microarray	20215506	Pancreas
hsa-mir-375	MIMAT0000728	NAGPA	51172	Microarray	20215506	Pancreas
hsa-mir-375	MIMAT0000728	NIN	51199	Microarray	20215506	Pancreas
hsa-mir-375	MIMAT0000728	CRIM1	51232	Microarray	20215506	Pancreas
hsa-mir-375	MIMAT0000728	ZNF571	51276	Microarray	20215506	Pancreas
hsa-mir-375	MIMAT0000728	CRLF3	51379	Microarray	20215506	Pancreas
hsa-mir-375	MIMAT0000728	NELFCD	51497	Microarray	20215506	Pancreas
hsa-mir-375	MIMAT0000728	SCLY	51540	Microarray	20215506	Pancreas
hsa-mir-375	MIMAT0000728	RASD1	51655	Luciferase reporter assay//Microarray//qRT-PCR	20978187	Pancreas
hsa-mir-375	MIMAT0000728	CAB39	51719	Microarray//qRT-PCR	20584986	Pancreas
hsa-mir-375	MIMAT0000728	NUP54	53371	HITS-CLIP//PAR-CLIP	23446348|21572407	Pancreas
hsa-mir-375	MIMAT0000728	GDAP1	54332	Microarray	20215506	Pancreas
hsa-mir-375	MIMAT0000728	NLE1	54475	Microarray	20215506	Pancreas
hsa-mir-375	MIMAT0000728	TMX3	54495	Microarray	20215506	Pancreas
hsa-mir-375	MIMAT0000728	EXOC6	54536	HITS-CLIP//Microarray	20215506|23824327	Pancreas
hsa-mir-375	MIMAT0000728	MINDY2	54629	Microarray	20215506	Pancreas
hsa-mir-375	MIMAT0000728	TMEM106B	54664	Microarray	20215506	Pancreas
hsa-mir-375	MIMAT0000728	NCAPG2	54892	HITS-CLIP	19536157	Pancreas
hsa-mir-375	MIMAT0000728	NSD3	54904	Microarray	20215506	Pancreas
hsa-mir-375	MIMAT0000728	PPP2R3C	55012	Microarray	20215506	Pancreas
hsa-mir-375	MIMAT0000728	RMDN3	55177	Microarray	20215506	Pancreas
hsa-mir-375	MIMAT0000728	APPL2	55198	Microarray	20215506	Pancreas
hsa-mir-375	MIMAT0000728	NAT10	55226	Microarray	20215506	Pancreas
hsa-mir-375	MIMAT0000728	OGFOD1	55239	Microarray	20215506	Pancreas
hsa-mir-375	MIMAT0000728	YY1AP1	55249	Luciferase reporter assay//Western blot	20226166	Pancreas
hsa-mir-375	MIMAT0000728	PGM2	55276	Microarray	20215506	Pancreas
hsa-mir-375	MIMAT0000728	TMEM74B	55321	Microarray	20215506	Pancreas
hsa-mir-375	MIMAT0000728	AGPAT5	55326	Microarray	20215506	Pancreas
hsa-mir-375	MIMAT0000728	MNS1	55329	Microarray	20215506	Pancreas
hsa-mir-375	MIMAT0000728	STRBP	55342	Microarray	20215506	Pancreas
hsa-mir-375	MIMAT0000728	PIP4P2	55529	Microarray	20215506	Pancreas
hsa-mir-375	MIMAT0000728	CDCA7L	55536	Microarray	20215506	Pancreas
hsa-mir-375	MIMAT0000728	VEZT	55591	Microarray	20215506	Pancreas
hsa-mir-375	MIMAT0000728	STAP2	55620	Microarray	20215506	Pancreas
hsa-mir-375	MIMAT0000728	G2E3	55632	PAR-CLIP	23592263	Pancreas
hsa-mir-375	MIMAT0000728	MREG	55686	Microarray	20215506	Pancreas
hsa-mir-375	MIMAT0000728	CCDC88A	55704	Microarray	20215506	Pancreas
hsa-mir-375	MIMAT0000728	ENAH	55740	Microarray	20215506	Pancreas
hsa-mir-375	MIMAT0000728	METTL2B	55798	Microarray	20215506	Pancreas
hsa-mir-375	MIMAT0000728	EMC3	55831	Microarray	20215506	Pancreas
hsa-mir-375	MIMAT0000728	CMAS	55907	Microarray	20215506	Pancreas
hsa-mir-375	MIMAT0000728	NXT2	55916	Microarray	20215506	Pancreas
hsa-mir-375	MIMAT0000728	NSFL1C	55968	Microarray	20215506	Pancreas
hsa-mir-375	MIMAT0000728	KLHL7	55975	Microarray	20215506	Pancreas
hsa-mir-375	MIMAT0000728	PDGFC	56034	Microarray	20215506	Pancreas
hsa-mir-375	MIMAT0000728	ZC3HAV1	56829	Microarray	20215506	Pancreas
hsa-mir-375	MIMAT0000728	BDH2	56898	Microarray	20215506	Pancreas
hsa-mir-375	MIMAT0000728	IFT46	56912	Microarray	20215506	Pancreas
hsa-mir-375	MIMAT0000728	C1GALT1	56913	Microarray	20215506	Pancreas
hsa-mir-375	MIMAT0000728	ARNTL2	56938	Microarray	20215506	Pancreas
hsa-mir-375	MIMAT0000728	CHPT1	56994	Microarray	20215506	Pancreas
hsa-mir-375	MIMAT0000728	PHTF2	57157	Microarray	20215506	Pancreas
hsa-mir-375	MIMAT0000728	KIAA1191	57179	Microarray//PAR-CLIP	20215506|20371350	Pancreas
hsa-mir-375	MIMAT0000728	PBXIP1	57326	Microarray	20215506	Pancreas
hsa-mir-375	MIMAT0000728	CYP20A1	57404	Microarray	20215506	Pancreas
hsa-mir-375	MIMAT0000728	USP31	57478	Microarray	20215506	Pancreas
hsa-mir-375	MIMAT0000728	NUFIP2	57532	PAR-CLIP	23592263	Pancreas
hsa-mir-375	MIMAT0000728	IFT80	57560	Microarray	20215506	Pancreas
hsa-mir-375	MIMAT0000728	CIP2A	57650	Luciferase reporter assay//Microarray//QRTPCR//Western blot	20215506|23552692	Pancreas
hsa-mir-375	MIMAT0000728	GATAD1	57798	Microarray	20215506	Pancreas
hsa-mir-375	MIMAT0000728	RAP2C	57826	Microarray	20215506	Pancreas
hsa-mir-375	MIMAT0000728	ENOPH1	58478	Microarray	20215506	Pancreas
hsa-mir-375	MIMAT0000728	ABHD4	63874	Microarray	20215506	Pancreas
hsa-mir-375	MIMAT0000728	RRAGC	64121	Microarray	20215506	Pancreas
hsa-mir-375	MIMAT0000728	AZI2	64343	Microarray	20215506	Pancreas
hsa-mir-375	MIMAT0000728	MPP5	64398	Microarray	20215506	Pancreas
hsa-mir-375	MIMAT0000728	MOSPD3	64598	Microarray	20215506	Pancreas
hsa-mir-375	MIMAT0000728	TNS3	64759	Microarray	20215506	Pancreas
hsa-mir-375	MIMAT0000728	DEPTOR	64798	Luciferase reporter assay//qRT-PCR//Western blot	28262546	Pancreas
hsa-mir-375	MIMAT0000728	USP46	64854	Microarray	20215506	Pancreas
hsa-mir-375	MIMAT0000728	PLEKHA3	65977	Microarray	20215506	Pancreas
hsa-mir-375	MIMAT0000728	MAPKAP1	79109	Microarray	20215506	Pancreas
hsa-mir-375	MIMAT0000728	CHPF	79586	Microarray	20215506	Pancreas
hsa-mir-375	MIMAT0000728	ADIPOR2	79602	Reporter assay	15806104	Pancreas
hsa-mir-375	MIMAT0000728	PPCS	79717	Microarray	20215506	Pancreas
hsa-mir-375	MIMAT0000728	BBS10	79738	PAR-CLIP	20371350	Pancreas
hsa-mir-375	MIMAT0000728	ZDHHC11	79844	Microarray	20215506	Pancreas
hsa-mir-375	MIMAT0000728	LPCAT1	79888	Microarray	20215506	Pancreas
hsa-mir-375	MIMAT0000728	WWC2	80014	Microarray	20215506	Pancreas
hsa-mir-375	MIMAT0000728	DGLUCY	80017	Microarray	20215506	Pancreas
hsa-mir-375	MIMAT0000728	GPR157	80045	Microarray	20215506	Pancreas
hsa-mir-375	MIMAT0000728	ZNF614	80110	Microarray	20215506	Pancreas
hsa-mir-375	MIMAT0000728	UXS1	80146	Microarray	20215506	Pancreas
hsa-mir-375	MIMAT0000728	GKAP1	80318	Microarray	20215506	Pancreas
hsa-mir-375	MIMAT0000728	CEP70	80321	Microarray	20215506	Pancreas
hsa-mir-375	MIMAT0000728	LIMD2	80774	Microarray	20215506	Pancreas
hsa-mir-375	MIMAT0000728	CEP44	80817	Microarray	20215506	Pancreas
hsa-mir-375	MIMAT0000728	ZFP91	80829	Microarray	20215506	Pancreas
hsa-mir-375	MIMAT0000728	SETD7	80854	Microarray	20215506	Pancreas
hsa-mir-375	MIMAT0000728	NETO2	81831	Microarray	20215506	Pancreas
hsa-mir-375	MIMAT0000728	APH1B	83464	Microarray	20215506	Pancreas
hsa-mir-375	MIMAT0000728	SYT15	83849	Microarray	20215506	Pancreas
hsa-mir-375	MIMAT0000728	TAF3	83860	Microarray	20215506	Pancreas
hsa-mir-375	MIMAT0000728	SNX25	83891	Microarray	20215506	Pancreas
hsa-mir-375	MIMAT0000728	KCTD10	83892	Microarray	20215506	Pancreas
hsa-mir-375	MIMAT0000728	FAM96A	84191	Microarray	20215506	Pancreas
hsa-mir-375	MIMAT0000728	FYTTD1	84248	Microarray	20215506	Pancreas
hsa-mir-375	MIMAT0000728	CCDC115	84317	HITS-CLIP//PAR-CLIP	23592263|24398324|23446348|22012620|21572407|20371350|23706177|22927820|27292025	Pancreas
hsa-mir-375	MIMAT0000728	PCGF5	84333	Microarray	20215506	Pancreas
hsa-mir-375	MIMAT0000728	GFM2	84340	Microarray	20215506	Pancreas
hsa-mir-375	MIMAT0000728	MAP3K21	84451	PAR-CLIP	20371350	Pancreas
hsa-mir-375	MIMAT0000728	DCTN5	84516	Microarray	20215506	Pancreas
hsa-mir-375	MIMAT0000728	C15orf41	84529	Microarray	20215506	Pancreas
hsa-mir-375	MIMAT0000728	EBPL	84650	Microarray	20215506	Pancreas
hsa-mir-375	MIMAT0000728	TMEM25	84866	Microarray	20215506	Pancreas
hsa-mir-375	MIMAT0000728	RPUSD4	84881	Microarray	20215506	Pancreas
hsa-mir-375	MIMAT0000728	TMTC4	84899	Microarray	20215506	Pancreas
hsa-mir-375	MIMAT0000728	SLC35B4	84912	Microarray	20215506	Pancreas
hsa-mir-375	MIMAT0000728	ATOH8	84913	PAR-CLIP	27292025	Pancreas
hsa-mir-375	MIMAT0000728	CEP19	84984	Microarray	20215506	Pancreas
hsa-mir-375	MIMAT0000728	PAQR8	85315	Microarray	20215506	Pancreas
hsa-mir-375	MIMAT0000728	ZFHX2	85446	Microarray	20215506	Pancreas
hsa-mir-375	MIMAT0000728	DISP2	85455	Microarray	20215506	Pancreas
hsa-mir-375	MIMAT0000728	CCDC32	90416	Microarray	20215506	Pancreas
hsa-mir-375	MIMAT0000728	STPG1	90529	Microarray	20215506	Pancreas
hsa-mir-375	MIMAT0000728	ZNF799	90576	HITS-CLIP	19536157	Pancreas
hsa-mir-375	MIMAT0000728	C12orf29	91298	Microarray	20215506	Pancreas
hsa-mir-375	MIMAT0000728	OXNAD1	92106	Microarray	20215506	Pancreas
hsa-mir-375	MIMAT0000728	MTDH	92140	Immunofluorescence//Luciferase reporter assay//Microarray//qRT-PCR//Western blot	22508479|20215506|22752059|25944465	Pancreas
hsa-mir-375	MIMAT0000728	TRMT10A	93587	Microarray	20215506	Pancreas
hsa-mir-375	MIMAT0000728	MED8	112950	Microarray	20215506	Pancreas
hsa-mir-375	MIMAT0000728	CYP2U1	113612	Microarray	20215506	Pancreas
hsa-mir-375	MIMAT0000728	PIK3IP1	113791	Microarray	20215506	Pancreas
hsa-mir-375	MIMAT0000728	MAL2	114569	HITS-CLIP	23824327	Pancreas
hsa-mir-375	MIMAT0000728	OSBPL8	114882	Microarray	20215506	Pancreas
hsa-mir-375	MIMAT0000728	PTPMT1	114971	Microarray	20215506	Pancreas
hsa-mir-375	MIMAT0000728	VASN	114990	Microarray	20215506	Pancreas
hsa-mir-375	MIMAT0000728	BATF2	116071	Microarray	20215506	Pancreas
hsa-mir-375	MIMAT0000728	NUS1	116150	Microarray	20215506	Pancreas
hsa-mir-375	MIMAT0000728	COX20	116228	Microarray	20215506	Pancreas
hsa-mir-375	MIMAT0000728	AEBP2	121536	Microarray	20215506	Pancreas
hsa-mir-375	MIMAT0000728	TMEM170A	124491	Microarray	20215506	Pancreas
hsa-mir-375	MIMAT0000728	LSM12	124801	Microarray	20215506	Pancreas
hsa-mir-375	MIMAT0000728	TPRG1L	127262	Microarray	20215506	Pancreas
hsa-mir-375	MIMAT0000728	GALM	130589	Microarray	20215506	Pancreas
hsa-mir-375	MIMAT0000728	GRPEL2	134266	Microarray	20215506	Pancreas
hsa-mir-375	MIMAT0000728	UBLCP1	134510	Microarray	20215506	Pancreas
hsa-mir-375	MIMAT0000728	ADAT2	134637	PAR-CLIP	22012620	Pancreas
hsa-mir-375	MIMAT0000728	NCOA7	135112	Microarray	20215506	Pancreas
hsa-mir-375	MIMAT0000728	MTPN	136319	Reporter assay	15538371	Pancreas
hsa-mir-375	MIMAT0000728	WFDC6	140870	HITS-CLIP	27418678	Pancreas
hsa-mir-375	MIMAT0000728	GSC	145258	Microarray	20215506	Pancreas
hsa-mir-375	MIMAT0000728	CEP128	145508	Microarray	20215506	Pancreas
hsa-mir-375	MIMAT0000728	TTC7B	145567	Microarray	20215506	Pancreas
hsa-mir-375	MIMAT0000728	CMTM4	146223	Microarray	20215506	Pancreas
hsa-mir-375	MIMAT0000728	ZNF785	146540	Microarray	20215506	Pancreas
hsa-mir-375	MIMAT0000728	SAMD11	148398	Microarray	20215506	Pancreas
hsa-mir-375	MIMAT0000728	CBWD2	150472	Microarray	20215506	Pancreas
hsa-mir-375	MIMAT0000728	SGO2	151246	Microarray	20215506	Pancreas
hsa-mir-375	MIMAT0000728	SH3D19	152503	Microarray	20215506	Pancreas
hsa-mir-375	MIMAT0000728	VPS37D	155382	Microarray	20215506	Pancreas
hsa-mir-375	MIMAT0000728	ANKRD46	157567	Microarray	20215506	Pancreas
hsa-mir-375	MIMAT0000728	SPRED1	161742	Microarray	20215506	Pancreas
hsa-mir-375	MIMAT0000728	ZNF540	163255	Microarray	20215506	Pancreas
hsa-mir-375	MIMAT0000728	TOR1AIP2	163590	Microarray	20215506	Pancreas
hsa-mir-375	MIMAT0000728	SGMS2	166929	Microarray	20215506	Pancreas
hsa-mir-375	MIMAT0000728	PAPD4	167153	Microarray	20215506	Pancreas
hsa-mir-375	MIMAT0000728	KLHDC8B	200942	Microarray	20215506	Pancreas
hsa-mir-375	MIMAT0000728	SLC39A11	201266	Microarray	20215506	Pancreas
hsa-mir-375	MIMAT0000728	REEP3	221035	Microarray	20215506	Pancreas
hsa-mir-375	MIMAT0000728	UBN2	254048	PAR-CLIP	23592263	Pancreas
hsa-mir-375	MIMAT0000728	BOD1L1	259282	Microarray	20215506	Pancreas
hsa-mir-375	MIMAT0000728	AQP11	282679	Microarray	20215506	Pancreas
hsa-mir-375	MIMAT0000728	POC1B	282809	Microarray	20215506	Pancreas
hsa-mir-375	MIMAT0000728	CCDC88B	283234	Microarray	20215506	Pancreas
hsa-mir-375	MIMAT0000728	TMED8	283578	Microarray	20215506	Pancreas
hsa-mir-375	MIMAT0000728	TMEM145	284339	Microarray	20215506	Pancreas
hsa-mir-375	MIMAT0000728	LYPD5	284348	Microarray	20215506	Pancreas
hsa-mir-375	MIMAT0000728	SLC25A42	284439	Microarray	20215506	Pancreas
hsa-mir-375	MIMAT0000728	FAM126B	285172	Microarray	20215506	Pancreas
hsa-mir-375	MIMAT0000728	PRRT3	285368	Microarray	20215506	Pancreas
hsa-mir-375	MIMAT0000728	DOK7	285489	Microarray	20215506	Pancreas
hsa-mir-375	MIMAT0000728	FAM200B	285550	HITS-CLIP	19536157	Pancreas
hsa-mir-375	MIMAT0000728	CEP57L1	285753	Microarray	20215506	Pancreas
hsa-mir-375	MIMAT0000728	METTL2A	339175	Microarray	20215506	Pancreas
hsa-mir-375	MIMAT0000728	ESPNL	339768	Microarray	20215506	Pancreas
hsa-mir-375	MIMAT0000728	ZNF404	342908	Microarray	20215506	Pancreas
hsa-mir-375	MIMAT0000728	SOX2-OT	347689	Flow//qRT-PCR	27800139	Pancreas
hsa-mir-375	MIMAT0000728	SKA2	348235	Microarray	20215506	Pancreas
hsa-mir-375	MIMAT0000728	SFT2D2	375035	Microarray	20215506	Pancreas
hsa-mir-375	MIMAT0000728	FAM89A	375061	Microarray	20215506	Pancreas
hsa-mir-375	MIMAT0000728	MALAT1	378938	Luciferase reporter assay//qRT-PCR	27658300	Pancreas
hsa-mir-375	MIMAT0000728	KMT5A	387893	Microarray//qRT-PCR	20584986	Pancreas
hsa-mir-375	MIMAT0000728	ZNF470	388566	HITS-CLIP	19536157	Pancreas
hsa-mir-375	MIMAT0000728	MIR17HG	407975	Microarray	20215506	Pancreas
hsa-mir-375	MIMAT0000728	IDNK	414328	Microarray	20215506	Pancreas
hsa-mir-375	MIMAT0000728	CBWD3	445571	Microarray	20215506	Pancreas
hsa-mir-375	MIMAT0000728	ZBTB8A	653121	Microarray	20215506	Pancreas
hsa-mir-375	MIMAT0000728	FAM196B	100131897	HITS-CLIP	19536157	Pancreas
