# Supplementary material for: Pseudogene AK4P1 promotes pancreatic ductal adenocarcinoma progression through relieving miR-375-mediated YAP1 degradation
Source: Aging (Albany NY). 2022 Feb 27;14(4):1983–2003. doi: 10.18632/aging.203921 (PMC8908928; doi:10.18632/aging.203921)
Supplement: Supplementary Table 4 [file aging-14-203921-s005.xlsx]

## Sheet: Supplementary Table 4
Supplementary Table 4. PPI network of potential target genes of miR-375 in PDAC predicted by STRING.
node_name	MCC	DMNC	MNC	Degree	EPC	BottleNeck	EcCentricity	Closeness	Radiality	Betweenness	Stress	ClusteringCoefficient	HR	95%CI	P	RFS-HR	95%CI	P	Relation	P	OS-HR	OS-P	DFS-HR	DFS-P
TP53	126000000000	0.2523	107	109	78.547	96	0.19095	256.567	7.62929	37039.8	241200	0.1208	1.4	0.9-2.17	0.13	2.35	0.87-6.32	0.085	0.42	4.4e-16
MYC	126000000000	0.35513	75	77	75.69	26	0.15912	235.8	7.48025	15899.5	111472	0.18694	1.85	1.18-2.89	0.0061	4.51	1.73-11.73	0.00085	0.23	1.1e-05
MAPK3	126000000000	0.36937	63	65	75.028	34	0.19095	229.15	7.45865	16661.5	117418	0.20337	1.35	0.82-2.25	0.24	0.52	0.21-1.33	0.16	0.57	0
CDH1	126000000000	0.41744	60	63	74.659	19	0.15912	226	7.40897	9967.97	80636	0.22529	1.86	1.14-3.03	0.012	3.73	1.38-10.09	0.0055	0.65	0	1.3	0.25
HSP90AA1	107000000000	0.29979	61	62	71.476	24	0.19095	226	7.41977	16821.2	131530	0.17187	1.6	1.04-2.47	0.03	1.6	0.59-4.34	0.35	0.58	0	1.5	0.074
CTNNB1	19300000000	0.3983	59	60	73.712	17	0.15912	220.417	7.342	8277.99	71130	0.23051	1.62	1.06-2.48	0.026	12.7	1.69-95.67	0.0017	0.64	0
CDC42	19200000000	0.34385	54	56	67.935	16	0.19095	219.183	7.35712	12566.9	102512	0.19675	1.5	0.99-2.27	0.056	1.79	0.78-4.13	0.16	0.66	0
CASP3	126000000000	0.41818	56	56	73.508	19	0.19095	222.533	7.39817	7322.78	64754	0.25455	1.83	1.11-3.03	0.017	3.02	1-9.14	0.042	0.6	0	1.5	0.066
STAT3	126000000000	0.52073	49	54	71.825	18	0.15912	217.75	7.33768	9297.16	71060	0.27184	1.32	0.83-2.09	0.23	1.98	0.82-4.79	0.12	0.48	0
RHOA	31200000000	0.3979	48	50	69.843	9	0.19095	218.433	7.37441	9023.48	83854	0.23429	1.58	1.05-2.39	0.029	5.48	1.8-16.61	0.00093	0.65	0	1.3	0.23
MDM2	107000000000	0.45796	45	45	69.668	7	0.15912	211.317	7.288	3340.57	32504	0.29899	0.55	0.36-0.83	0.004				0.33	1.5e-10
ERBB2	126000000000	0.53688	44	45	69.244	9	0.15912	212.85	7.31608	4180.24	40258	0.33737	1.67	0.99-2.79	0.051				0.18	0.00057
PIK3CA	38000000000	0.51979	40	42	67.424	6	0.15912	209.75	7.28368	5352.19	41924	0.3194	1.94	1.23-3.05	0.0036				0.73	0	1.4	0.12
EZH2	538000000	0.4612	40	42	64.954	5	0.15912	204.683	7.20376	5653.53	52330	0.28339	1.97	1.28-3.04	0.0017				0.47	0	1.2	0.3
CDC5L	92200000000000	0.39792	36	39	47.398	3	0.15912	195.5	7.08928	8042.85	48570	0.23752	1.45	0.95-2.21	0.081				0.62	0
IGF1R	126000000000	0.61045	34	34	65.455	5	0.15912	202.433	7.2232	1578.91	17446	0.43672	0.83	0.54-1.3	0.42				0.37	5.9e-13
RPTOR	4033751	0.42538	30	33	52.798	6	0.19095	199.017	7.1692	5194.05	45126	0.26136	0.57	0.36-0.92	0.018				0.53	0
JAK2	120000000000	0.63805	32	33	65.284	4	0.15912	202.333	7.21888	2719.72	27236	0.4375	0.76	0.5-1.16	0.2				0.46	0
SOX2	49900000	0.61388	29	31	62.406	4	0.15912	199.55	7.18	2844.1	26342	0.4043	0.68	0.45-1.03	0.069				0.15	0.0038
BCL2L1	87700000000	0.60735	29	30	60.684	4	0.19095	198.15	7.17784	2466.7	23416	0.42759	0.73	0.46-1.16	0.18				0.62	0
YAP1	541293	0.4128	26	29	55.497	3	0.19095	193.383	7.1044	4381.74	39242	0.25862	1.52	1.01-2.29	0.044				0.76	0	1.8	0.0061	1.4	0.13
YWHAZ	2546043	0.44365	28	29	58.321	5	0.15912	201.867	7.22968	2009.04	21472	0.31527	0.61	0.4-0.94	0.022				0.69	0
SF3B3	92200000000000	0.89047	20	29	37.536	8	0.15912	179.067	6.87327	3625.29	19534	0.35961	0.67	0.45-1.01	0.056				0.64	0
PARP1	45600000	0.5199	28	28	60.847	1	0.19095	199.483	7.20376	1099.14	13372	0.39683	2.12	1.31-3.4	0.0015				0.47	0	1.1	0.51
TBP	370437	0.38346	27	28	48.316	2	0.15912	190.433	7.06984	2855.13	22830	0.27513	0.57	0.38-0.87	0.0086				0.47	0
PSEN1	10171	0.36955	26	27	48.398	3	0.15912	193.983	7.13248	4944.05	37756	0.26781	2.35	1.38-3.98	0.0011				0.67	0	1.6	0.028	1.7	0.024
BCL2L11	93900000000	0.69317	27	27	62.854	1	0.15912	193.65	7.12384	1560.76	16912	0.53561	1.54	1-2.35	0.046				0.49	0	1	0.94
TNS1	126000000000	0.78535	27	27	62.922	2	0.15912	198.75	7.19944	695.645	9744	0.60684	1.44	0.87-2.38	0.15				0.36	4.1e-12
SP1	4971052	0.53152	24	26	54.475	7	0.15912	193.817	7.126	3024.11	26308	0.36308	1.77	1.07-2.92	0.025				0.69	0	1.7	0.015	1.3	0.21
ITGB1	6320000000	0.68406	26	26	61.217	1	0.15912	194.233	7.13248	557.477	7128	0.53538	0.82	0.53-1.27	0.38				0.68	0
JAG1	662892	0.55052	25	25	53.25	3	0.15912	193.45	7.13464	703.349	9568	0.43667	2.59	1.7-3.95	4e-06				0.63	0	1.7	0.011
PRPF19	92200000000000	0.72521	24	24	34.728	1	0.15912	173.467	6.82359	762.543	7768	0.58333	1.45	0.96-2.2	0.078				0.5	0
ELAVL2	92200000000000	1.10097	17	24	39.907	8	0.15912	178.667	6.91647	2759.69	19738	0.52174	0.52	0.34-0.78	0.0016				0.048	0.37
CSTF2	92200000000000	0.81393	21	23	31.803	2	0.15912	164.983	6.67887	766.044	4870	0.56917	2.05	1.19-3.54	0.0081				0.66	0	1.3	0.28
PAFAH1B1	185	0.24286	17	23	30.556	7	0.19095	182.467	6.97264	5096.48	34608	0.13043	0.55	0.36-0.83	0.0039				0.58	0
XIAP	87700000000	0.6731	23	23	55.426	2	0.15912	192.7	7.13032	1049.02	12034	0.54941	1.33	0.85-2.07	0.21				0.56	0
EFTUD2	92200000000000	0.72636	23	23	39.755	1	0.15912	178.367	6.91215	1274.77	12662	0.59289	1.98	1.16-3.41	0.011				0.52	0	1.3	0.23
MYCN	65600000	0.71026	22	23	57.448	4	0.15912	192.467	7.11736	742.55	8244	0.53755	1.46	0.97-2.21	0.069				0.16	0.0034
NUDT21	92200000000000	0.87818	20	22	35.272	2	0.15912	173.2	6.83223	1882.49	12662	0.61905	0.53	0.35-0.81	0.0029				0.69	0
PLRG1	92200000000000	0.81959	21	22	31.826	1	0.15912	166.3	6.70911	772.523	5160	0.62771	1.92	1.15-3.22	0.011				0.57	0	1.2	0.35
SUZ12	97024	0.44914	22	22	44.392	2	0.15912	181.583	6.95536	1259.2	14994	0.37229	0.61	0.39-0.96	0.032				0.55	0
CTGF	943520	0.50659	22	22	51.961	4	0.15912	190.983	7.10656	2427.7	23180	0.41991	0.71	0.47-1.09	0.11				0.41	2.9e-15
PRPF8	92200000000000	0.84785	21	22	33.303	1	0.15912	168.35	6.73719	1569.61	11804	0.64935	1.99	1.3-3.05	0.0012				0.15	0.0055	0.47	0.00052
BCAS2	92200000000000	0.82524	21	21	35.248	5	0.19095	182.933	7.00072	2155.51	16680	0.69524	1.65	1.09-2.48	0.016				0.63	0	1.3	0.2
PRKCA	47159	0.41146	20	21	47.159	4	0.15912	190.783	7.11088	1893.74	14678	0.31905	1.4	0.85-2.28	0.18				0.59	0
SNRPA1	92200000000000	0.87818	20	21	33.555	3	0.15912	162.883	6.64863	1231.02	8322	0.68095	0.45	0.3-0.69	0.00014				0.57	0
SNRNP200	92200000000000	0.87204	20	21	29.616	2	0.15912	160.467	6.60975	1135.04	8448	0.67619	1.81	1.07-3.07	0.025				0.53	0
DNMT3B	53691	0.54359	18	21	44.862	3	0.15912	183.133	6.99424	2667.27	22268	0.35714	1.54	1-2.37	0.05				-0.25	3.3e-06
UBE3A	564	0.35897	16	20	40.131	7	0.19095	190.233	7.1152	2649.47	19994	0.21053	1.58	1.03-2.42	0.035				0.039	0.47
TFRC	12494	0.42096	17	19	43.585	5	0.15912	186.917	7.06336	1856.8	15668	0.30409
DNAJC8	92200000000000	0.9448	19	19	33.567	1	0.15912	158.883	6.60111	61.1142	600	0.82456
DLG4	12021	0.51153	16	19	45.231	8	0.15912	185.417	7.03744	3108.99	24868	0.33918
NUMB	5031	0.46278	18	19	44.259	4	0.15912	189.783	7.11088	1025.95	10078	0.36842
RBPJ	3932	0.47763	17	19	42.153	2	0.15912	180.05	6.95752	1432.26	13042	0.34503
KLF4	339265	0.71254	18	19	49.861	1	0.15912	186.383	7.0504	525.121	5982	0.56725
CTNNA1	1581	0.39667	18	19	45.374	1	0.19095	186.2	7.05904	955.247	9186	0.31579
CWC15	92200000000000	0.9582	19	19	31.256	1	0.15912	159.017	6.60111	217.952	2098	0.83626
SNRNP40	92200000000000	0.9448	19	19	31.183	1	0.15912	160.8	6.62919	151.167	1304	0.82456
PRPF6	92200000000000	1.01371	18	19	31.466	2	0.15912	159.667	6.61191	552.851	5280	0.80702
ATG7	363996	0.50686	18	18	47.087	4	0.15912	186.317	7.06336	737.153	8068	0.45098
TPR	165	0.24036	15	18	32.137	6	0.19095	182.65	7.01368	3585.78	26294	0.15686
SNRPB2	92200000000000	1.10097	17	18	29.783	1	0.15912	157.5	6.57735	93.6077	448	0.88889
LAMTOR1	408370	0.46278	18	18	26.935	1	0.15912	167.05	6.74583	1492.06	9386	0.41176
EXOC7	46406	0.44809	18	18	30.522	3	0.19095	176.45	6.90999	1934.28	18360	0.39869
EXOC3	46587	0.50191	17	18	35.551	1	0.19095	179.017	6.95752	1465.04	15606	0.40523
RUNX3	92288	0.55858	17	17	45.499	1	0.15912	182.467	7.00504	475.283	5260	0.50735
SETD7	9780	0.5181	17	17	42.282	3	0.15912	182.1	6.9964	607.901	7192	0.47059
LAMTOR2	408269	0.5205	16	17	22.8	5	0.15912	164.55	6.72639	2841.39	18662	0.42647
EXOC2	46115	0.64394	12	17	26.976	10	0.19095	172.317	6.84735	3977.86	26238	0.33088
DDX23	92200000000000	1.10097	17	17	29.472	1	0.15912	156.5	6.56871	0	0	1
NCAM1	767762	0.74324	14	16	45.398	3	0.15912	184.217	7.04176	1386.78	10130	0.55
PEBP1	466	0.48295	12	16	38.543	4	0.15912	181.267	6.99424	2318.59	16908	0.275
TAF3	362893	0.66175	11	16	27.292	3	0.15912	176.2	6.91647	2399.58	16656	0.325
NCSTN	1203	0.4726	13	16	31.071	3	0.13639	172.426	6.84087	2115.92	13722	0.30833
COG3	5101	0.38056	15	16	21.424	2	0.15912	161.75	6.68319	1663.64	11082	0.31667
EXOC5	46261	0.5408	15	16	25.752	2	0.19095	169.083	6.79551	2021.31	16154	0.45
TAF1	362970	0.47563	16	16	31.506	1	0.15912	176.533	6.91863	432.416	3358	0.44167
PSIP1	16	0.30898	3	15	22.541	4	0.15912	167.817	6.77175	1124.03	7086	0.0381
BIRC3	41081	0.47297	14	15	37.396	5	0.15912	178.383	6.95104	2031.75	16274	0.4
BCL2	3629768	0.61091	15	15	42.015	4	0.15912	183.9	7.04176	964.594	11116	0.58095
DDOST	137	0.31924	10	15	18.803	5	0.15912	171.583	6.83871	3588.2	23346	0.1619
PTPN1	7257847	0.72071	14	15	43.621	4	0.15912	180.933	6.99424	2085.14	17342	0.60952
SET	51	0.25546	13	14	28.579	4	0.19095	179.433	6.98128	1558.9	9178	0.21978
CENPF	110	0.31531	14	14	26.536	5	0.15912	178.267	6.95968	1877.49	13994	0.30769
GTPBP4	28	0.32929	7	14	24.644	4	0.15912	180.533	6.98776	3158.09	21408	0.13187
EXO1	332	0.36036	14	14	31.568	1	0.15912	175.217	6.90999	471.347	4464	0.35165
AP3B1	251	0.40573	9	14	25.466	3	0.15912	168.7	6.81063	2114.39	14282	0.1978
TAF5	363727	0.65143	13	14	25.953	1	0.15912	167.767	6.78903	181.592	1790	0.56044
RRAGB	408289	0.70252	13	14	18.072	2	0.15912	146.883	6.39158	680.521	7574	0.6044
KRT8	730921	0.79029	12	13	41.247	3	0.15912	182.567	7.03312	1068.64	7184	0.69231
DUT	738	0.47733	9	13	31.7	4	0.19095	178.783	6.98128	2854.9	23206	0.25641
EFNB2	193	0.39514	12	13	37.419	1	0.15912	179.083	6.97696	965.681	8458	0.34615
SDC1	403204	0.7466	11	13	39.614	5	0.15912	180.8	7.00072	2216.33	19102	0.57692
AXL	3629808	0.75361	13	13	40.121	1	0.15912	182.267	7.02016	59.2495	1158	0.75641
RB1CC1	403214	0.61311	13	13	25.519	1	0.15912	173.417	6.88623	693.563	8050	0.61538
RAB6A	67	0.3366	12	13	17.533	3	0.15912	158.75	6.64215	2123.69	14206	0.29487
IGFBP3	816	0.40874	13	13	33.781	1	0.15912	173.117	6.87327	762.375	8294	0.41026
TCEB1	63	0.37904	8	13	20.909	4	0.15912	165.533	6.75015	2649.92	20964	0.16667
RRAGA	408288	0.70252	13	13	17.881	1	0.15912	146.133	6.3851	27.6922	302	0.70513
EXOC8	46208	0.58756	13	13	21.255	1	0.19095	160.8	6.67455	750.893	8880	0.58974
TAF6	363721	0.71711	12	13	24.071	1	0.15912	167.433	6.78903	263.649	2102	0.62821
RRAGC	408288	0.70252	13	13	17.522	1	0.15912	146.133	6.3851	27.6922	302	0.70513
LAMTOR3	362895	0.60003	12	13	20.877	1	0.15912	160.717	6.68967	901.183	8940	0.52564
TAF11	363726	0.65143	13	13	24.409	1	0.15912	167.1	6.78471	205.38	2416	0.65385
SUB1	27	0.26253	9	12	24.44	1	0.15912	176.45	6.93808	792.617	7194	0.16667
EEA1	855	0.44117	11	12	29.63	10	0.15912	179.4	6.98992	4370.08	26778	0.39394
PSME4	20	0.23326	8	12	22.475	5	0.15912	173.033	6.87975	1704.78	11524	0.12121
CDKN2B	87120	0.76102	12	12	42.891	1	0.15912	176.75	6.93592	19.3487	348	0.78788
LPCAT1	131	0.52304	6	12	19.122	3	0.15912	161.4	6.69399	1177.95	8270	0.21212
RAB10	734	0.32197	12	12	20.871	1	0.15912	155.767	6.60975	349.864	3314	0.33333
HEY1	823	0.49207	11	12	31.471	2	0.15912	171.083	6.85383	346.82	3204	0.43939
EIF2AK2	161	0.3733	11	12	27.923	3	0.15912	177.367	6.96184	1971.52	16724	0.33333
DUSP6	993	0.49207	11	12	33.729	3	0.15912	175.3	6.92296	984.946	6618	0.43939
MRE11A	191	0.4242	11	12	29.628	1	0.15912	174.167	6.90783	585.385	4524	0.37879
TAF12	362908	0.60003	12	12	23.984	2	0.15912	170.167	6.84303	276.92	2470	0.62121
EXOC6	46208	0.67321	12	12	23.285	1	0.19095	159.083	6.65295	140.606	2318	0.69697
SYNCRIP	22	0.23866	9	11	23.929	3	0.15912	175.967	6.93592	940.666	9448	0.18182
BBS10	30	0.32073	8	11	16.454	3	0.15912	162.767	6.71775	532.026	4030	0.23636
FKBP1A	165	0.39905	10	11	28.921	4	0.15912	170.55	6.85815	279.313	2970	0.36364
PRDX1	107	0.3791	10	11	29.537	1	0.15912	180.317	7.01368	795.758	6464	0.34545
TGM2	404	0.45814	11	11	32.607	1	0.15912	174.15	6.90783	195.698	2090	0.49091
MAP2K4	181	0.41901	10	11	29.98	2	0.15912	177.433	6.964	1039.34	5962	0.38182
RHOQ	40452	0.61085	11	11	20.279	1	0.19095	157.333	6.62919	63.3504	682	0.65455
ENAH	251	0.49567	8	11	27.517	3	0.15912	175.433	6.93808	1394.08	9544	0.30909
NOLC1	17	0.2842	4	11	23.66	2	0.15912	166.8	6.79119	1067.68	8952	0.14545
LRP5	126	0.40723	11	11	29.884	1	0.15912	167.35	6.79983	92.1136	1042	0.43636
DEPTOR	40334	0.55995	11	11	18.685	1	0.15912	151.983	6.52767	104.854	1490	0.6
PSEN2	867	0.49882	10	11	28.748	2	0.15912	163.283	6.72855	495.96	5198	0.45455
CUL5	173	0.43896	10	11	27.29	2	0.15912	174.883	6.92296	830.678	6686	0.4
EIF2S1	22	0.32929	7	11	19.226	2	0.15912	165.883	6.77391	584.992	4532	0.18182
EED	326	0.44117	11	11	24.431	2	0.15912	167.117	6.79119	362.08	4040	0.47273
LAMTOR4	408240	0.83144	11	11	16.109	1	0.15912	144.3	6.36566	6.54789	90	0.89091
LAMTOR5	367926	0.7466	11	11	17.046	2	0.15912	167.783	6.80631	423.762	5344	0.8
KPNA4	13	0.25931	5	10	18.703	8	0.15912	169.05	6.81927	2512.58	17008	0.08889
SENP1	17	0.25611	7	10	24.55	4	0.15912	171.4	6.86247	1156.2	6818	0.15556
BSN	12	0.2842	4	10	8.909	4	0.15912	143.883	6.36998	2453.57	17056	0.08889
MPP5	37	0.36588	7	10	22.355	2	0.15912	165.417	6.76743	613.123	5168	0.22222
PHLPP1	848	0.6123	8	10	29.847	4	0.15912	173.1	6.90783	2043.2	13160	0.46667
RAB3D	130	0.64826	5	10	15.174	1	0.15912	154.517	6.58383	645.31	3374	0.33333
CTSC	133	0.64826	5	10	16.134	2	0.15912	147.283	6.43046	891.206	8486	0.33333
HK2	41	0.47549	6	10	21.796	3	0.15912	172.883	6.89703	1786.16	10456	0.26667
GATA6	171	0.45346	9	10	26.377	2	0.15912	163.95	6.73935	935.072	7424	0.42222
RPGR	18	0.47366	4	10	13.703	5	0.15912	147.467	6.4175	2416.48	18302	0.11111
STX6	44	0.29929	10	10	10.93	1	0.15912	148.683	6.48447	267.568	2442	0.33333
STX3	154	0.46652	8	10	14.031	2	0.15912	138.55	6.24038	475.083	5452	0.35556
MAPKAP1	49	0.38186	9	10	21.036	3	0.15912	161.967	6.71775	587.692	4130	0.35556
WWC1	13	0.25931	5	10	16.731	4	0.15912	149.483	6.4607	1908.33	18184	0.11111
RBBP8	181	0.47733	9	10	26.069	1	0.15912	170.383	6.85599	100.783	1022	0.44444
SETD8	172	0.49567	8	10	21.074	4	0.15912	165.817	6.77607	1160.39	8236	0.37778
RPN1	22	0.45378	5	10	10.691	2	0.15912	148.367	6.45638	852.45	5968	0.2
TAF2	362881	0.85919	9	10	18.968	1	0.15912	165.1	6.76959	409.509	2374	0.8
CPSF6	128	0.37904	8	10	22.519	1	0.15912	166.033	6.78687	433.989	4502	0.31111
TAF7	362886	0.7582	10	10	21.122	1	0.15912	165.017	6.76959	14.4778	154	0.84444
TCF12	32	0.40246	7	9	24.587	3	0.15912	165.133	6.76743	1830.51	10154	0.30556
USP1	33	0.34989	8	9	21.95	1	0.15912	169.133	6.84303	184.566	1682	0.33333
SH3BP4	5042	0.76834	7	9	14.821	1	0.13639	146.86	6.43478	123.835	1132	0.58333
UNC13B	39	0.34989	8	9	10.08	1	0.15912	143.1	6.35054	492.139	5006	0.33333
FOLR1	129	0.4082	8	9	10.205	5	0.15912	151.85	6.53847	853.522	6234	0.38889
NAT10	14	0.32413	5	9	11.483	2	0.15912	148.283	6.44774	612.522	3444	0.16667
DEK	29	0.32073	8	9	24.576	1	0.15912	168.633	6.83007	119.98	1036	0.30556
ZC3HAV1	248	0.5854	7	9	25.493	2	0.15912	161.933	6.72855	990.285	7328	0.44444
LMAN2	129	0.4082	8	9	5.859	1	0.13639	130.293	6.01789	250.102	1516	0.38889
RAPGEF1	386	0.54893	9	9	27.898	1	0.19095	168.633	6.83439	152.685	1720	0.63889
RPGRIP1L	131	0.4082	8	9	10.177	3	0.15912	156.867	6.62703	1359.88	10352	0.38889
USP10	19	0.33284	6	9	19.716	3	0.15912	171.367	6.87327	1769.09	9628	0.19444
EIF4EBP2	44	0.33413	9	9	20.074	1	0.15912	157.75	6.65943	168.879	2310	0.38889
EIF2S2	14	0.32413	5	9	13.867	2	0.15912	153.4	6.55575	1106.83	8648	0.16667
COG2	49	0.4082	8	9	13.394	1	0.15912	153.283	6.56871	461.608	3066	0.38889
LDHB	9	0.30898	3	8	16.598	3	0.13639	158.743	6.66807	394.577	2746	0.10714
SESN1	32	0.29157	8	8	20.192	5	0.15912	166.667	6.80415	338.034	3874	0.35714
UCHL3	8	0.30779	2	8	15.545	2	0.15912	154.95	6.58599	389.686	2784	0.03571
PRDX3	52	0.47549	6	8	20.673	4	0.15912	168.383	6.84735	1303.37	7666	0.35714
NCAPG2	18	0.33284	6	8	12.817	1	0.15912	145.383	6.42398	129.482	768	0.25
ARHGAP11A	30	0.34989	8	8	15.462	1	0.15912	155.65	6.62487	264.567	2694	0.42857
EIF4G3	18	0.26242	8	8	18.417	1	0.15912	159.183	6.67887	329.025	2680	0.32143
SGOL2	44	0.37904	8	8	13.776	3	0.15912	154.633	6.59679	218.638	1922	0.46429
IFT80	9	0.30898	3	8	6.37	3	0.13639	137.91	6.22526	2134.22	15540	0.07143
SEC23A	127	0.47564	7	8	7.877	1	0.13639	139.443	6.27926	263.201	2292	0.46429
AEBP2	74	0.57059	6	8	14.361	2	0.13639	143.043	6.33542	1458.36	15632	0.42857
MYBL1	721	0.71324	6	7	13.84	1	0.15912	142.55	6.37862	89.6585	638	0.71429
CBX3	50	0.58344	5	7	15.089	2	0.13639	145.51	6.40238	914.95	12204	0.42857
ENSG00000279576	96	0.54881	7	7	25.787	1	0.15912	168.117	6.83007	10.3222	216	0.71429
SEMA3C	17	0.33284	6	7	18.315	1	0.15912	156.667	6.64215	61.8738	590	0.33333
REEP5	11	0.23775	6	7	14.206	5	0.15912	163.667	6.76311	2373.6	15932	0.2381
MLEC	20	0.32929	7	7	8.905	1	0.13639	137.526	6.22742	340.52	2068	0.42857
CEP70	123	0.52304	6	7	14.858	1	0.15912	159.483	6.70695	131.683	1410	0.52381
ELL2	721	0.71324	6	7	16.189	1	0.15912	146.45	6.4283	102.57	648	0.71429
PGM2	8	0.30898	3	7	5.64	1	0.15912	137.3	6.24686	427.672	2350	0.09524
ODF2	124	0.43905	7	7	10.004	3	0.15912	152.967	6.57303	1448.26	10424	0.57143
SPAG9	20	0.45378	5	7	19.243	3	0.15912	163.967	6.76527	805.308	4870	0.33333
MST1R	127	0.57059	6	7	24.348	1	0.15912	163.75	6.77607	52.2133	610	0.57143
ALMS1	128	0.47564	7	7	11.204	1	0.15912	154.4	6.59895	349.955	3336	0.61905
EXT1	10	0.25931	5	7	6.332	4	0.13639	133.226	6.1583	1419.06	12282	0.19048
NLE1	10	0.46346	3	7	8.623	2	0.13639	142.06	6.34838	1265.5	6910	0.19048
FZD4	25	0.42794	6	7	21.795	1	0.13639	157.51	6.64215	32.2057	378	0.42857
SEC24C	124	0.43905	7	7	6.899	1	0.15912	136.933	6.2231	234.432	1946	0.57143
IFIT1	28	0.45378	5	7	10.021	4	0.19095	155.15	6.63135	1181.04	7480	0.38095
ARHGDIA	38	0.40246	7	7	23.106	1	0.15912	161.133	6.72639	88.8108	1066	0.52381
RAD50	146	0.51223	7	7	21.933	1	0.15912	168.75	6.85167	41.882	584	0.66667
PSENEN	840	0.69516	7	7	20.007	1	0.13639	151.01	6.51471	2.84903	26	0.90476
RPN2	15	0.47366	4	7	5.072	2	0.13639	131.569	6.06542	862.816	4316	0.2381
TNS3	10	0.37893	4	6	16.978	2	0.15912	154.7	6.61623	111.749	1098	0.26667
ELAVL4	27	0.45378	5	6	16.272	2	0.15912	157.067	6.64863	912.018	5138	0.46667
ACSL3	15	0.38896	5	6	17.49	4	0.15912	166.35	6.80847	316.174	2744	0.4
TGFB2	25	0.51861	5	6	18.906	5	0.13639	155.376	6.61407	396.293	3172	0.53333
WHSC1L1	11	0.32413	5	6	16.152	2	0.13639	155.626	6.62055	899.623	4694	0.33333
KDSR	6	0.30779	2	6	4.852	3	0.13639	131.169	6.09782	1236.83	9048	0.13333
TNPO3	7	0.30898	3	6	11.32	1	0.15912	146.717	6.44342	184.063	1198	0.13333
GPHN	6	0.30779	2	6	9.4	1	0.15912	145.033	6.42614	253.258	1470	0.06667
NT5C2	6	0	1	6	6.899	2	0.15912	138.383	6.26846	901.542	7768	0
DCTN5	16	0.33284	6	6	13.514	1	0.15912	156.45	6.64431	245.734	2198	0.46667
CALU	30	0.42794	6	6	17.716	3	0.15912	163.683	6.76527	342.24	4068	0.6
RAB3B	9	0.46346	3	6	7.22	1	0.15912	141.433	6.34838	195.41	1216	0.2
MKRN1	72	0.57059	6	6	17.474	1	0.15912	163.917	6.78039	41.5245	796	0.8
ACSL4	6	0.30779	2	6	8.739	4	0.13639	149.21	6.49959	1553.29	9390	0.13333
ABI2	10	0.37893	4	6	17.647	2	0.15912	166.35	6.83007	1520.18	8408	0.26667
MAP3K8	15	0.38896	5	6	19.845	2	0.15912	170.017	6.88191	237.805	1732	0.4
PTPN12	121	0.64826	5	6	23.012	2	0.15912	161.133	6.72639	850.883	6000	0.66667
GOLGA4	31	0.51861	5	6	10.723	1	0.15912	141.883	6.3635	192.026	862	0.53333
SNAPC1	720	0.71324	6	6	14.06	1	0.15912	140.5	6.3203	0	0	1
VASN	6	0.30779	2	6	9.853	4	0.15912	146.733	6.45854	2711.11	14904	0.13333
BAK1	122	0.52304	6	6	23.804	1	0.15912	164.75	6.79335	9.05027	152	0.73333
IFIT3	30	0.42794	6	6	12.871	1	0.15912	156.217	6.64431	355.853	3398	0.6
NUP54	8	0.2842	4	6	10.673	1	0.15912	151.617	6.55575	204.854	1598	0.2
WTAP	7	0.30898	3	6	9.376	2	0.15912	152.65	6.57087	145.636	1228	0.2
CBLL1	10	0.37893	4	6	18.24	2	0.15912	162.767	6.75447	414.732	2728	0.33333
G2E3	6	0.30898	3	5	13.999	4	0.15912	162.533	6.75879	892.178	4930	0.2
RAB28	8	0.46346	3	5	5.413	4	0.15912	131.183	6.11294	1104.43	9906	0.3
PHF3	5	0.30779	2	5	11.326	2	0.15912	156.1	6.65943	1010.85	4058	0.1
SLC4A1AP	5	0.30779	2	5	10.44	3	0.15912	144.267	6.40454	515.424	3132	0.1
OPA1	8	0.46346	3	5	15.46	3	0.15912	152.9	6.59031	1209.44	7624	0.3
DNAH11	5	0	1	5	6.449	2	0.15912	143.167	6.39158	948.642	5312	0
SPOP	7	0.2842	4	5	12.862	2	0.15912	161.983	6.74367	81.7789	582	0.3
KLHL7	13	0.47366	4	5	8.849	2	0.13639	126.545	5.94445	486.768	3042	0.5
CREB3	5	0.30779	2	5	13.33	1	0.15912	150.8	6.55359	87.1407	672	0.1
MED8	6	0.30898	3	5	7.421	2	0.15912	141.25	6.33758	158.064	1152	0.2
TNNI3	5	0.30779	2	5	11.566	4	0.15912	148.533	6.50391	156.038	1922	0.2
CDCA7L	6	0.30898	3	5	12.003	1	0.15912	159.567	6.70911	340.991	2110	0.2
RTN2	6	0.30898	3	5	3.139	2	0.13639	122.269	5.88181	895.087	6028	0.2
THRA	8	0.46346	3	5	17.945	2	0.15912	157.567	6.66159	104.75	1036	0.3
KIAA1524	10	0.32413	5	5	17.405	2	0.15912	168.417	6.85599	139.181	1356	0.5
PDK1	14	0.38896	5	5	17.522	1	0.15912	160.233	6.71559	12.1382	148	0.6
CHGB	8	0.46346	3	5	6.852	1	0.15912	130.683	6.10214	299.132	3704	0.3
ITIH4	5	0.30779	2	5	10.265	2	0.15912	160.717	6.72423	1116.54	5316	0.1
AHCYL1	5	0.30779	2	5	7.593	1	0.15912	136.7	6.24038	139.803	612	0.1
MAT2B	5	0.30779	2	5	8.562	1	0.15912	142.583	6.38294	238.592	1092	0.1
NIN	7	0.2842	4	5	5.924	1	0.15912	137.2	6.2663	750.092	6208	0.3
CHPT1	8	0.46346	3	5	5.661	1	0.15912	135.467	6.21446	133.927	624	0.3
FZD8	30	0.51861	5	5	18.613	1	0.15912	160.183	6.71343	10.5637	180	0.8
BAZ1A	5	0.30779	2	5	11.555	4	0.19095	167.95	6.85599	2098.83	7122	0.1
SEC24A	120	0.64826	5	5	4.501	1	0.13639	121.243	5.83213	0	0	1
APH1B	120	0.64826	5	5	15.65	1	0.13639	148.676	6.48879	0	0	1
PRRT3	4	0	1	4	4.197	2	0.15912	130.167	6.11726	307.376	2426	0
DNAJC2	6	0.2842	4	4	13.291	1	0.15912	155.35	6.63999	32.2091	372	0.5
PLAG1	4	0.30779	2	4	8.69	3	0.13639	146.16	6.44126	923.051	5594	0.16667
NAGPA	4	0.30779	2	4	5.227	2	0.15912	130.267	6.08702	168.947	1302	0.16667
ERP44	4	0.30779	2	4	5.094	1	0.13639	132.743	6.17342	113.301	972	0.16667
C1QBP	4	0.30779	2	4	10.261	1	0.15912	150.567	6.56223	139.414	946	0.16667
STK38L	4	0	1	4	7.841	1	0.15912	141.017	6.34622	255.999	1410	0
PPP2R3C	4	0.30779	2	4	9.37	2	0.13639	135.46	6.22958	886.97	9112	0.16667
NUS1	5	0.30898	3	4	7.707	3	0.15912	159.85	6.71775	779.381	5520	0.33333
ANKRD1	6	0.2842	4	4	7.907	1	0.15912	136.8	6.2555	30.0187	202	0.5
MTDH	7	0.46346	3	4	15.448	1	0.13639	159.01	6.69399	238.817	1876	0.5
RASD1	4	0.30779	2	4	8.67	3	0.15912	150.233	6.55791	143.811	1598	0.16667
AGPAT5	4	0.30779	2	4	3.799	1	0.13639	127.305	6.00493	63.3227	388	0.16667
CDR2	4	0.30779	2	4	7.661	1	0.13639	151.593	6.56007	63.3862	444	0.16667
SP110	24	0.56839	4	4	5.59	1	0.15912	127.483	6.05894	0	0	1
TRPS1	7	0.46346	3	4	14.129	3	0.13639	153.376	6.59679	302.127	3192	0.5
BCL10	8	0.37893	4	4	12.614	3	0.15912	148.583	6.51903	177.367	2002	0.66667
METTL2B	4	0.30779	2	4	7.264	2	0.13639	139.81	6.33542	718.129	6054	0.16667
WDR1	4	0	1	4	3.66	1	0.13639	123.793	5.94445	555.561	3322	0
CHSY1	5	0.30898	3	4	4.273	2	0.13639	121.512	5.81269	403.629	1598	0.33333
FYTTD1	4	0.30779	2	4	8.369	1	0.15912	135.567	6.2231	26.5693	200	0.33333
AMMECR1	4	0.30779	2	4	2.046	2	0.11934	116.23	5.69389	96.1899	510	0.33333
FSTL3	7	0.46346	3	4	11.162	1	0.13639	144.926	6.41534	80.3149	750	0.5
HOXB3	7	0.46346	3	4	13.087	1	0.15912	144.883	6.41966	14.0103	216	0.5
SKA2	24	0.56839	4	4	9.246	1	0.15912	149.867	6.53631	0	0	1
PCGF5	24	0.56839	4	4	11.519	1	0.13639	138.86	6.2879	0	0	1
NDST1	5	0.30898	3	4	8.877	2	0.13639	137.676	6.27062	553.847	6080	0.33333
IFI6	24	0.56839	4	4	5.281	1	0.15912	127.483	6.05894	0	0	1
AP3D1	4	0	1	4	4.639	2	0.15912	131.833	6.1475	909.557	5362	0
KIAA1429	4	0.30779	2	4	7.978	1	0.15912	133.583	6.18206	32.026	174	0.33333
NUPL1	4	0.30779	2	4	5.618	1	0.15912	134.317	6.20366	92.4549	520	0.16667
ZBED1	3	0	1	3	8.07	1	0.15912	139.65	6.33542	93.481	610	0
PLEKHA3	3	0	1	3	2.559	4	0.13639	128.193	6.07838	2704.11	14120	0
MOSPD3	3	0.30779	2	3	2.351	1	0.13639	120.652	5.86237	87.2169	198	0.33333
EMC3	3	0	1	3	2.12	1	0.13639	112.995	5.60317	78.0982	338	0
PRKX	3	0	1	3	4.526	2	0.15912	127.933	6.0611	782.783	4634	0
POC1B	3	0	1	3	2.203	3	0.13639	115.112	5.64637	1812.51	14676	0
CCDC115	3	0	1	3	4.969	1	0.13639	131.412	6.12806	55.0344	254	0
FKBP1B	3	0.30779	2	3	8.895	1	0.15912	150.967	6.55791	17.0492	232	0.33333
CPOX	3	0	1	3	4.579	2	0.15912	135.933	6.25334	896.059	3990	0
CCDC88A	3	0	1	3	9.651	1	0.15912	155.367	6.64215	50.0341	620	0
TBC1D5	3	0	1	3	2.493	2	0.13639	116.269	5.71117	898.378	5790	0
AZI2	3	0.30779	2	3	4.544	3	0.15912	126.783	6.02005	1760	9924	0.33333
ADAT2	3	0	1	3	8.266	4	0.15912	159.933	6.72423	346.649	2520	0
CAB39	3	0	1	3	6.715	1	0.15912	137.867	6.29438	40.3404	186	0
DPYSL3	3	0	1	3	12.661	1	0.15912	148.983	6.53415	1.08099	22	0
ADIPOR2	3	0	1	3	6.662	2	0.13639	144.36	6.4283	285.207	1954	0
UXS1	4	0.30898	3	3	2.567	1	0.13639	109.574	5.48652	6.79385	126	0.66667
SFT2D2	3	0.30779	2	3	1.509	2	0.13639	109.838	5.51244	882	4732	0.33333
GDAP1	3	0	1	3	4.02	2	0.13639	118.198	5.77165	892.037	6136	0
CYP20A1	3	0	1	3	2.248	1	0.13639	121.793	5.91421	487.424	2764	0
UBLCP1	3	0.30779	2	3	4.681	2	0.13639	130.336	6.10862	92.3714	696	0.33333
RCN2	3	0.30779	2	3	8.579	1	0.15912	160.65	6.74151	13.8089	218	0.33333
PDGFC	3	0.30779	2	3	10.643	1	0.13639	143.043	6.4067	8.87431	82	0.33333
VGLL4	3	0.30779	2	3	6.211	1	0.15912	134.417	6.19934	66.7141	402	0.33333
ENSG00000204176	4	0.30898	3	3	2.975	1	0.13639	113.652	5.60101	8.93985	54	0.66667
NRBP1	3	0	1	3	3.349	2	0.13639	123.212	5.91421	900.141	7004	0
DGKD	3	0	1	3	5.499	1	0.13639	134.41	6.22526	116.548	986	0
NPPB	4	0.30898	3	3	5.536	1	0.13639	132.293	6.17342	3.60436	44	0.66667
CORO1C	3	0	1	3	7.766	3	0.13639	149.593	6.53199	404.188	2470	0
NXT2	3	0.30779	2	3	1.861	1	0.11934	112.146	5.57724	16.9016	48	0.33333
CLDN1	4	0.30898	3	3	11.638	1	0.13639	152.043	6.58167	7.90942	110	0.66667
CEP128	3	0.30779	2	3	2.35	2	0.13639	114.205	5.65069	882	6680	0.33333
ENOPH1	3	0	1	3	1.602	1	0.11934	112.963	5.62045	157.551	918	0
RMDN3	3	0	1	3	4.161	3	0.13639	128.976	6.08918	1763.13	14248	0
TTC7B	3	0	1	3	1.287	3	0.11934	99.9321	5.13443	1762	9130	0
C11orf54	3	0	1	3	4.508	2	0.13639	130.093	6.11078	662.656	3974	0
CFL2	3	0	1	3	7.576	1	0.15912	146.067	6.48231	236.763	1706	0
STRBP	3	0	1	3	7.39	1	0.15912	138.05	6.29654	36.898	254	0
PHF20L1	3	0	1	3	3.082	2	0.13639	123.076	5.92285	463.314	2136	0
IL1RAP	3	0.30779	2	3	9.925	1	0.13639	147.593	6.48879	24.2068	158	0.33333
ASAP2	3	0.30779	2	3	7.648	2	0.15912	145.633	6.47799	253.176	1620	0.33333
CHPF	3	0.30779	2	3	4.087	1	0.13639	121.193	5.84509	243.041	1274	0.33333
CKAP2	6	0.46346	3	3	4.3	1	0.13639	127.193	6.04598	0	0	1
PAFAH2	6	0.46346	3	3	4.492	1	0.15912	132.45	6.16046	0	0	1
TIMM17A	3	0	1	3	3.225	1	0.13639	122.095	5.86885	185.656	1068	0
UGCG	3	0.30779	2	3	5.093	2	0.13639	141.026	6.36566	735.187	4754	0.33333
DR1	6	0.46346	3	3	7.515	1	0.13639	134.293	6.21014	0	0	1
CARD8	3	0	1	3	12.418	1	0.15912	158.9	6.72855	67.6139	842	0
IFT46	3	0.30779	2	3	2.313	2	0.13639	118.638	5.77165	85.4385	452	0.33333
GFM2	2	0	1	2	1.14	3	0.00647	2	0.02263	2	2	0
RIMS3	2	0	1	2	2.357	1	0.13639	111.24	5.51892	36.1786	102	0
CYP2U1	2	0	1	2	1.267	1	0.11934	100.68	5.17116	23.8416	44	0
WWC2	2	0.30779	2	2	6.398	1	0.15912	132.833	6.17558	0	0	1
NSFL1C	2	0	1	2	1.577	1	0.13639	104.85	5.33964	18.291	88	0
SLC7A1	2	0	1	2	1.287	2	0.13639	98.2857	5.07179	882	4964	0
OSBPL8	2	0	1	2	1.506	2	0.11934	99.6655	5.14092	882	7118	0
SON	2	0	1	2	5.141	1	0.13639	130.952	6.1259	2.45476	30	0
PTPMT1	2	0	1	2	6.127	2	0.13639	149.71	6.54063	937.302	3854	0
FAH	2	0	1	2	5.325	2	0.13639	134.436	6.19502	124.8	586	0
REEP3	2	0	1	2	1.581	1	0.11934	105.936	5.34612	75.7296	180	0
INSIG2	2	0.30779	2	2	10.793	1	0.15912	157.967	6.69399	0	0	1
GAS8	2	0	1	2	1.961	1	0.13639	108.588	5.47356	11.647	38	0
HERPUD1	2	0	1	2	4.945	2	0.13639	132.31	6.18422	882	5060	0
SDCCAG3	2	0	1	2	2.447	1	0.15912	120.733	5.85373	100.389	536	0
COL12A1	2	0.30779	2	2	7.14	1	0.15912	135	6.23606	0	0	1
DIP2C	2	0.30779	2	2	2.501	1	0.13639	112.014	5.5686	0	0	1
SLC25A42	2	0	1	2	3.96	1	0.13639	122.345	5.89261	268.839	1394	0
VEZT	2	0.30779	2	2	8.774	1	0.15912	147.2	6.50391	0	0	1
SCLY	2	0	1	2	1.253	1	0.13639	101.15	5.20572	13.3807	26	0
ESPNL	2	0	1	2	1.96	2	0.15912	121.367	5.91853	347.83	1426	0
MREG	2	0	1	2	2.421	1	0.13639	119.61	5.84941	3	4	0
TMTC4	2	0.30779	2	2	1.475	1	0.11934	107.339	5.42172	0	0	1
TRMT10A	2	0	1	2	1.694	1	0.11934	105.775	5.38716	6.03168	32	0
METTL2A	2	0	1	2	2.83	1	0.13639	126.476	6.0395	186.447	1730	0
PIK3IP1	2	0	1	2	5.94	1	0.15912	141.533	6.3743	10.4496	162	0
APPL2	2	0	1	2	2.797	1	0.13639	122.626	5.92717	19.2014	72	0
FBXO8	2	0	1	2	3.503	2	0.13639	128.61	6.10646	167.405	1426	0
TBX19	2	0.30779	2	2	1.527	1	0.13639	109.338	5.51028	0	0	1
HOXB13	2	0	1	2	6.12	1	0.13639	136.56	6.25766	4.21561	38	0
CEP44	2	0	1	2	1.744	1	0.13639	104.931	5.331	38.8213	172	0
B3GALNT1	2	0	1	2	2.438	1	0.13639	122.636	5.92069	15.4869	46	0
SLC6A6	2	0	1	2	6.597	5	0.15912	159.517	6.72639	438.461	2460	0
ZNF470	2	0	1	2	1.661	1	0.15912	121.733	5.92933	51.4333	332	0
TMEM55A	2	0	1	2	6.635	1	0.13639	139.193	6.33758	130.923	916	0
F3	2	0	1	2	5.365	2	0.15912	146.967	6.51039	882	3512	0
IDNK	2	0	1	2	2.52	2	0.13639	117.926	5.77813	882	4466	0
HDHD1	2	0	1	2	1.43	1	0.13639	100.7	5.17332	27.3077	64	0
MTPN	2	0	1	2	3.367	1	0.13639	119.436	5.82997	65.1085	418	0
USP46	2	0	1	2	4.13	1	0.13639	127.193	6.0611	4.11816	38	0
TIMM8A	2	0	1	2	1.752	1	0.13639	106.821	5.385	22.0387	64	0
SH3D19	2	0.30779	2	2	4.835	1	0.13639	133.793	6.21662	0	0	1
NELFCD	2	0	1	2	7.007	1	0.13639	145.61	6.46286	22.4757	238	0
SPRED1	2	0	1	2	4.818	1	0.13639	131.81	6.1691	9.67778	78	0
RAP2C	2	0.30779	2	2	3.783	1	0.13639	118.143	5.78461	0	0	1
GALM	2	0.30779	2	2	2.759	1	0.13639	124.319	5.98117	0	0	1
KHK	2	0	1	2	5.148	1	0.13639	128.993	6.10646	2.73333	10	0
CRLF1	2	0	1	2	7.034	1	0.13639	136.76	6.28574	14.8826	160	0
SLC35B4	2	0	1	2	1.154	2	0.11934	91.094	4.69811	882	7240	0
MBD2	2	0	1	2	4.175	1	0.13639	128.293	6.07406	89.9977	446	0
DCUN1D4	2	0.30779	2	2	3.371	1	0.13639	126.36	6.03086	0	0	1
STAP2	2	0.30779	2	2	11.107	1	0.13639	143.693	6.42182	0	0	1
GRPEL2	2	0	1	2	6.109	1	0.15912	146.117	6.48231	446.008	2720	0
SGMS2	2	0.30779	2	2	1.454	1	0.11934	108.789	5.4822	0	0	1
HOMER2	2	0.30779	2	2	8.342	1	0.15912	145.517	6.46934	0	0	1
RPUSD4	1	0	1	1	1.076	1	0.00323	1.5	0.0194	0	0	0
TMED5	1	0	1	1	2.446	1	0.13639	121.048	5.88613	0	0	0
TMEM25	1	0	1	1	1.316	1	0.11934	108.456	5.48868	0	0	0
PHACTR2	1	0	1	1	1.794	1	0.11934	102.592	5.277	0	0	0
DOK7	1	0	1	1	4.457	1	0.13639	131.576	6.17342	0	0	0
KCNQ2	1	0	1	1	4.011	1	0.13639	127.893	6.08486	0	0	0
KCNN4	1	0	1	1	1.07	1	0.00431	1	0.01293	0	0	0
CTDSP2	1	0	1	1	1.07	1	0.00431	1	0.01293	0	0	0
C14orf159	1	0	1	1	1.071	1	0.10608	81.0111	4.18185	0	0	0
SERP1	1	0	1	1	1.696	1	0.11934	101.075	5.23164	0	0	0
ARNTL2	1	0	1	1	3.631	1	0.15912	130.35	6.16262	0	0	0
PTP4A2	1	0	1	1	1.062	1	0.00431	1	0.01293	0	0	0
ZBTB8A	1	0	1	1	1.062	1	0.00431	1	0.01293	0	0	0
CNN3	1	0	1	1	5.965	1	0.15912	141.983	6.40454	0	0	0
LHFPL2	1	0	1	1	1.18	1	0.11934	87.3595	4.55986	0	0	0
RDH11	1	0	1	1	1.352	1	0.11934	103.358	5.27268	0	0	0
TMEM106B	1	0	1	1	1.273	1	0.11934	91.25	4.75859	0	0	0
TMEM145	1	0	1	1	3.56	1	0.15912	126	6.02005	0	0	0
MAL2	1	0	1	1	5.424	1	0.15912	141.983	6.40454	0	0	0
COX20	1	0	1	1	1.084	1	0.00323	1.5	0.0194	0	0	0
SIPA1L3	1	0	1	1	1.075	1	0.00431	1	0.01293	0	0	0
KIAA0232	1	0	1	1	1.075	1	0.00431	1	0.01293	0	0	0
CRIM1	1	0	1	1	2.162	1	0.11934	106.235	5.38284	0	0	0
KIAA1804	1	0	1	1	2.992	1	0.13639	124.526	6.01141	0	0	0
KIAA1191	1	0	1	1	1.079	1	0.00431	1	0.01293	0	0	0
NCOA7	1	0	1	1	1.079	1	0.00431	1	0.01293	0	0	0
PHLDA1	1	0	1	1	4.058	1	0.13639	123.31	5.97037	0	0	0
PPP1R2	1	0	1	1	1.675	1	0.13639	111.938	5.60317	0	0	0
SNPH	1	0	1	1	1.325	1	0.13639	106.671	5.4174	0	0	0
CMAS	1	0	1	1	1.435	1	0.11934	101.025	5.20572	0	0	0
SLC7A6	1	0	1	1	1.088	1	0.11934	80.0583	4.11921	0	0	0
ARL2BP	1	0	1	1	6.837	1	0.13639	144.776	6.45638	0	0	0
ATOH8	1	0	1	1	2.859	1	0.13639	118.219	5.81485	0	0	0
HRSP12	1	0	1	1	1.159	1	0.11934	92.4083	4.82555	0	0	0
DAZAP2	1	0	1	1	2.796	1	0.13639	123.526	5.98549	0	0	0
MNS1	1	0	1	1	1.777	1	0.11934	103.358	5.27268	0	0	0
RASSF8	1	0	1	1	3.251	1	0.15912	121.283	5.89477	0	0	0
SAMD4A	1	0	1	1	4.309	1	0.13639	124.01	5.96389	0	0	0
ZFP36L2	1	0	1	1	1.08	1	0.10608	81.004	4.18833	0	0	0
GPR157	1	0	1	1	1.069	1	0.00431	1	0.01293	0	0	0
PAQR8	1	0	1	1	1.069	1	0.00431	1	0.01293	0	0	0
GSC	1	0	1	1	2.845	1	0.13639	117.495	5.78677	0	0	0
WFDC6	1	0	1	1	1.069	1	0.00431	1	0.01293	0	0	0
ZNF540	1	0	1	1	1.069	1	0.00431	1	0.01293	0	0	0
FAM89A	1	0	1	1	1.058	1	0.00431	1	0.01293	0	0	0
ZFHX2	1	0	1	1	1.058	1	0.00431	1	0.01293	0	0	0
UBN2	1	0	1	1	1.472	1	0.13639	113.96	5.70685	0	0	0
ANKRD46	1	0	1	1	1.075	1	0.00431	1	0.01293	0	0	0
FAM63B	1	0	1	1	1.075	1	0.00431	1	0.01293	0	0	0
CXADR	1	0	1	1	4.265	1	0.13639	127.593	6.08918	0	0	0
DPY19L1	1	0	1	1	2.211	1	0.13639	118.502	5.82349	0	0	0
HN1	1	0	1	1	6.023	1	0.13639	148.543	6.52767	0	0	0
MR1	1	0	1	1	1.821	1	0.13639	114.245	5.69605	0	0	0
OTX1	1	0	1	1	5.901	1	0.13639	134.043	6.22742	0	0	0
OXNAD1	1	0	1	1	1.394	1	0.13639	102.974	5.30076	0	0	0
B7RP1	1	0	1	1	5.533	1	0.15912	133.5	6.22526	0	0	0
OGFOD1	1	0	1	1	2.795	1	0.13639	121.519	5.92069	0	0	0
PPCS	1	0	1	1	3.169	1	0.15912	125.083	6.02869	0	0	0
IL17RA	1	0	1	1	5.451	1	0.13639	141.376	6.3851	0	0	0
NUFIP2	1	0	1	1	1.073	1	0.00431	1	0.01293	0	0	0
LSM12	1	0	1	1	1.073	1	0.00431	1	0.01293	0	0	0
CRLF3	1	0	1	1	3.026	1	0.13639	116.636	5.77597	0	0	0
PIGB	1	0	1	1	1.351	1	0.11934	99.8262	5.14524	0	0	0
LITAF	1	0	1	1	1.291	1	0.11934	92.475	4.81907	0	0	0
TRIM66	1	0	1	1	2.318	1	0.11934	107.768	5.4498	0	0	0
DESI1	1	0	1	1	2.593	1	0.13639	121.402	5.90989	0	0	0
CEP19	1	0	1	1	1.17	1	0.11934	90.0476	4.69811	0	0	0
ZFP91	1	0	1	1	1.119	1	0.13639	100.507	5.19492	0	0	0
PROCR	1	0	1	1	1.18	1	0.13639	109.336	5.5578	0	0	0
TSC22D2	1	0	1	1	1.181	1	0.11934	95.4774	4.96163	0	0	0
TPRG1L	1	0	1	1	1.724	1	0.13639	106.671	5.4174	0	0	0
BOD1L1	1	0	1	1	1.647	1	0.11934	113.47	5.66797	0	0	0
FAM126B	1	0	1	1	1.081	1	0.10608	81.0111	4.18185	0	0	0
TNFSF13	1	0	1	1	2.899	1	0.15912	125.3	6.02869	0	0	0
FAM3C	1	0	1	1	1.659	1	0.13639	116.319	5.77165	0	0	0
SLC35A3	1	0	1	1	1.07	1	0.10608	75.1536	3.74552	0	0	0
KIAA0513	1	0	1	1	2.789	1	0.13639	109.614	5.50812	0	0	0
